1  
2  
3  
4  
5  
6  
7  
8  
9  
10  
11  
12  
13  
14  
15  
16  
17  
18  
19  
20  
21  
22  
23  
24  
25  
26

**FHF2 phosphorylation and regulation of native myocardial Na<sub>v</sub>1.5 channels**

**Adrien Lesage<sup>a</sup>, Maxime Lorenzini<sup>a1</sup>, Sophie Burel<sup>a2</sup>, Marine Sarlandie<sup>a</sup>, Floriane Bibault<sup>a</sup>, Dan Maloney<sup>b</sup>, Jonathan R. Silva<sup>c</sup>, R. Reid Townsend<sup>d,e</sup>, Jeanne M. Nerbonne<sup>e,f</sup> and Céline Marionneau<sup>a†</sup>**

<sup>a</sup>Nantes Université, CNRS, INSERM, l'institut du thorax, F-44000 Nantes, France; <sup>b</sup>Bioinformatics Solutions Inc., Waterloo, ON, Canada; <sup>c</sup>Department of Biomedical Engineering, Washington University in Saint Louis, MO, USA; Departments of <sup>d</sup>Cell Biology and Physiology, <sup>e</sup>Medicine and <sup>f</sup>Developmental Biology, Washington University Medical School, Saint Louis, MO, USA.

**†Correspondence to:** Céline Marionneau, ORCID ID: 0000-0003-0962-9756, Email: [celine.marionneau@univ-nantes.fr](mailto:celine.marionneau@univ-nantes.fr), Tel: +33 2 28 08 01 78, l'institut du thorax, INSERM UMR 1087, CNRS UMR 6291, IRS-Nantes Université, 8 Quai Moncousu, BP 70721, 44007 Nantes Cedex 1, France

<sup>1</sup>**Current address:** B'SYS, Witterswil, Switzerland

<sup>2</sup>**Current address:** UMR 703 INRAe/ONIRIS PAnTher, Nantes, France

**Running Title:** Regulation of Na<sub>v</sub>1.5 by FHF2 phosphorylation

**eTOC Summary:**

Lesage *et al.* identify the phosphorylation sites of FHF2 from mouse left ventricular Na<sub>v</sub>1.5 channel complexes. While no roles for FHF2 phosphosites could be recognized yet, the findings demonstrate differential FHF2-dependent regulation of neonatal and adult mouse ventricular Na<sub>v</sub>1.5 channels.

## Regulation of Na<sub>v</sub>1.5 by FHF2 phosphorylation

### 27 **Abstract**

28           Phosphorylation of the cardiac Na<sub>v</sub>1.5 channel pore-forming subunit is extensive and critical in  
29 modulating channel expression and function, yet the regulation of Na<sub>v</sub>1.5 by phosphorylation of its  
30 accessory proteins remains elusive. Using a phosphoproteomic analysis of Na<sub>v</sub> channel complexes  
31 purified from mouse left ventricles, we identified nine phosphorylation sites on Fibroblast growth factor  
32 Homologous Factor 2 (FHF2). To determine the roles of phosphosites in regulating Na<sub>v</sub>1.5, we developed  
33 two models from neonatal and adult mouse ventricular cardiomyocytes in which FHF2 expression is  
34 knockdown and rescued by WT, phosphosilent or phosphomimetic FHF2-VY. While the increased rates  
35 of closed-state and open-state inactivation of Na<sub>v</sub> channels induced by the FHF2 knockdown are  
36 completely restored by the FHF2-VY isoform in adult cardiomyocytes, sole a partial rescue is obtained in  
37 neonatal cardiomyocytes. The FHF2 knockdown also shifts the voltage-dependence of activation towards  
38 hyperpolarized potentials in neonatal cardiomyocytes, which is not rescued by FHF2-VY. Parallel  
39 investigations showed that the FHF2-VY isoform is predominant in adult cardiomyocytes, while  
40 expression of FHF2-VY and FHF2-A is comparable in neonatal cardiomyocytes. Similar to WT FHF2-  
41 VY, however, each FHF2-VY phosphomutant restores the Na<sub>v</sub> channel inactivation properties in both  
42 models, preventing identification of FHF2 phosphosite roles. FHF2 knockdown also increases the late  
43 Na<sup>+</sup> current in adult cardiomyocytes, which is restored similarly by WT and phosphosilent FHF2-VY.  
44 Together, our results demonstrate that ventricular FHF2 is highly phosphorylated, implicate differential  
45 roles for FHF2 in regulating neonatal and adult mouse ventricular Na<sub>v</sub>1.5, and suggest that the regulation  
46 of Na<sub>v</sub>1.5 by FHF2 phosphorylation is highly complex.

47

48

49 **Keywords:** Cardiac Na<sub>v</sub>1.5 channels; phosphoproteomics; native FHF2 phosphorylation sites; FHF2  
50 isoforms; neonatal and adult mouse ventricular cardiomyocytes

51

## Regulation of Na<sub>v</sub>1.5 by FHF2 phosphorylation

52 **Abbreviations:** A, alanine; E, glutamate; FHF2, Fibroblast growth factor Homologous Factor 2; FHF2-  
53 VY, isoform VY of Fibroblast growth factor Homologous Factor 2; I<sub>Na</sub>, peak Na<sup>+</sup> current; I<sub>NaL</sub>, late Na<sup>+</sup>  
54 current; IP, immunoprecipitation; mαNa<sub>v</sub>PAN, anti-Na<sub>v</sub> channel subunit mouse monoclonal antibody;  
55 MS, Mass Spectrometry; MS1, mass spectrum of peptide precursors; MS2 or MS/MS, fragmentation  
56 mass spectrum of peptides selected in narrow mass range (2 Da) from MS1 scan; Na<sub>v</sub>, voltage-gated Na<sup>+</sup>  
57 channel; pS, phosphoserine; pT, phosphothreonine; S, serine; T, threonine; WT, Wild-Type.

58

59

60

61

62

63

64

65

66

67

68

69

70

71

72

73

74

75

76

77

78 **Introduction**

79 Voltage-gated Na<sup>+</sup> (Na<sub>v</sub>) channels are critical determinants of myocardial excitability, driving the  
80 fast upstroke of the action potential and conduction of electrical impulse through the myocardium (Chen-  
81 Izu et al., 2015). While most Na<sub>v</sub> channels undergo rapid activation and inactivation to generate the peak  
82 Na<sup>+</sup> current (I<sub>Na</sub>), a tiny fraction (~0.5%) of channels remains open, leaving a small persistent Na<sup>+</sup> influx,  
83 known as the late Na<sup>+</sup> current (I<sub>NaL</sub>), which critically contributes to determining action potential duration.  
84 In ventricular cardiomyocytes, Na<sub>v</sub> channels are composed primarily of the Na<sub>v</sub>1.5 channel pore-forming  
85 subunit, which critically functions in macromolecular protein complexes. As such, these channels are  
86 tightly embedded within local signaling domains, in which they are dynamically regulated by a rich  
87 repertoire of accessory proteins and post-translational modifications (PTMs) (Marionneau and Abriel,  
88 2015). Defects in Na<sub>v</sub>1.5 channel functioning and/or regulation by these components underlie diverse  
89 forms of inherited or acquired cardiac arrhythmias. Impaired inactivation of Na<sub>v</sub>1.5 channels, notably,  
90 leads to alterations in channel availability and/or enhances I<sub>NaL</sub>, that can cause severe arrhythmias,  
91 including long QT syndrome 3, Brugada syndrome or conduction slowing. Leveraging the endogenous  
92 regulatory mechanisms of Na<sub>v</sub>1.5 channels is therefore essential to decipher arrhythmogenic Na<sub>v</sub> current  
93 defects. Several recent studies in the laboratory demonstrated that the cardiac Na<sub>v</sub>1.5 protein is highly  
94 phosphorylated, and that phosphorylation-dependent regulation of Na<sub>v</sub>1.5 channels is critical in  
95 regulating the expression or functioning of the channel, as well as interactions with accessory proteins  
96 (Marionneau et al., 2012; Lorenzini et al., 2021). This is the case for example of serines 1933 and 1984 in  
97 the C-terminal domain of Na<sub>v</sub>1.5, which regulate the interaction with the Fibroblast growth factor  
98 Homologous Factor 2 (FHF2) and calmodulin, and associated channel inactivation properties (Burel et al.,  
99 2017). While numerous phosphorylation sites have been identified on the Na<sub>v</sub>1.5 protein, phosphorylation  
100 of the other channel complex components and the impact of these modifications on Na<sub>v</sub>1.5 channel  
101 expression or properties remains unappreciated.

102 A promising pool from which such regulation by phosphorylation may be found is the FHF  
103 accessory proteins. FHFs have emerged as pivotal players in controlling the inactivation properties of

## Regulation of Na<sub>v</sub>1.5 by FHF2 phosphorylation

104 cardiac Na<sub>v</sub>1.5 channels, tuning both channel availability (Wang et al., 2011a; Park et al., 2016; Wang et  
105 al., 2017; Santucci et al., 2022) and I<sub>NaL</sub> (Abrams et al., 2020; Gade et al., 2020; Chakouri et al., 2022).  
106 The FHF family comprises four members (FHF1=FGF12, FHF2=FGF13, FHF3=FGF11, and  
107 FHF4=FGF14), and further family diversity is achieved through the generation of several alternatively  
108 spliced isoforms highly diverging from their N-amino termini (Munoz-Sanjuan et al., 2000). FHFs are  
109 small intracellular proteins interacting directly with the membrane proximal portion of the C-terminal  
110 domain of Na<sub>v</sub> channels through their common FGF homology core domain in a 1:1 stoichiometry (Goetz  
111 et al., 2009; Wang et al., 2011b). The structural basis by which FHFs regulate Na<sub>v</sub> channels emerged in  
112 2012 with the crystal structure of the ternary complex formed by a Na<sub>v</sub> C-terminal domain, a FHF and  
113 Ca<sup>2+</sup>-free calmodulin (Wang et al., 2012), and was more recently determined by solving the cryo-electron  
114 microscopy structure of human Na<sub>v</sub>1.5 (Gade et al., 2020). The different FHF isoforms demonstrate  
115 species-, age-, tissue- and subcellular-specific expression patterns, and affect Na<sub>v</sub> channel properties  
116 distinctively (Yang et al., 2016). In addition to their broad distribution in the nervous system, the FHF  
117 isoforms are prominently expressed in the mammalian heart. While FHF2-VY is the predominant FHF  
118 isoform in mouse ventricles, with FHF2 knockout or knockdown mice displaying severe conduction  
119 slowing (Wang et al., 2011a; Park et al., 2016; Wang et al., 2017), FHF1-B is preponderant in human  
120 hearts (Santucci et al., 2022), and has been linked to inherited arrhythmias including Brugada syndrome  
121 (Hennessey et al., 2013), long QT syndrome 3 (Liu et al., 2003), idiopathic ventricular tachycardia (Li et  
122 al., 2017), and atrial and ventricular arrhythmias with sudden cardiac death (Musa et al., 2015). In  
123 addition to its ascribed function in regulating Na<sub>v</sub> channel inactivation properties, some studies have  
124 demonstrated that FHF2 also participates in regulating the surface expression of Na<sub>v</sub>1.5 channels in  
125 cardiomyocytes (Wang et al., 2011a; Hennessey et al., 2013; Wang et al., 2017), in a way that may be  
126 reminiscent of the well-recognized role of FHF4 in concentrating neuronal Na<sub>v</sub> channels to axon initial  
127 segments and nodes of Ranvier (Goetz et al., 2009; Wang et al., 2011b).

128 Evidence for the role of phosphorylation in regulating FHF-dependent regulation of Na<sub>v</sub> channels  
129 has mostly been provided in neuroscience studies, driven in large part by the identification of kinases that

## Regulation of Na<sub>v</sub>1.5 by FHF2 phosphorylation

130 regulate the FHF-Na<sub>v</sub> channel interface. Specifically, phosphorylation of neuronal Na<sub>v</sub> channels by  
131 Glycogen Synthase Kinase 3  $\beta$  (GSK3 $\beta$ ) (Shavkunov et al., 2013; James et al., 2015; Hsu et al., 2017),  
132 protein kinase CK2 (Hsu et al., 2016), Ca<sup>2+</sup>/Calmodulin-dependent protein Kinase II (CaMKII)  
133 (Wildburger et al., 2015), as well as the tyrosine kinase Janus Kinase 2 (JAK2) (Wadsworth et al., 2020)  
134 has been demonstrated to promote binding of FHF proteins to Na<sub>v</sub> channels and associated FHF-mediated  
135 channel regulation.

136           In this study, we investigated the pattern of phosphorylation of native mouse left ventricular  
137 FHF2 and the roles of identified FHF2 phosphorylation sites in regulating the cardiac I<sub>Na</sub> current.  
138 Furthermore, by comparing the distinct consequences of FHF2 knockdown and rescue in ventricular  
139 cardiomyocytes isolated from neonatal and adult mice, as well as the FHF2 isoform expression profile,  
140 we sought to determine the differential representation and functions of FHF2 isoforms in regulating  
141 neonatal and adult mouse ventricular Na<sub>v</sub>1.5 channels.

142

143

144

145

146

147

148

149

150

151

152

153

154

155

156 **Results**

157 **Identification and stoichiometry of nine native FHF2 phosphorylation sites from mouse left**  
158 **ventricular Na<sub>v</sub> channel complexes**

159 The identification of the FHF2 protein from mouse left ventricles was obtained from the mass  
160 spectrometric analysis of mouse left ventricular Na<sub>v</sub> channel complexes purified by immunoprecipitation  
161 (IP) using an anti-Na<sub>v</sub>PAN mouse monoclonal (mαNa<sub>v</sub>PAN) antibody as previously described (Lorenzini  
162 et al., 2021). Among the 52 unique (169 total) FHF peptides detected in the mαNa<sub>v</sub>PAN-IPs, 38 (117  
163 total) peptides were specific for FHF2 and conserved across the five FHF2 isoforms (**Figure 1A & Table**  
164 **Supplement 1**). While 8 additional unique (25 total) peptides located in the alternatively spliced N-  
165 terminus of the FHF2-VY isoform and 4 unique (24 total) peptides common to the FHF2-VY and FHF2-  
166 Y N-termini could be discriminated, no peptides specific for the three other FHF2 isoforms (FHF2-V,  
167 FHF2-A and FHF2-B) were detected. Hence, as highlighted in yellow in **Figure 1A**, 84 % of the FHF2-  
168 VY amino acid sequence was covered by mass spectrometry, representing most of the protein sequence.  
169 In addition to FHF2 peptides, sole one peptide specific for, and common to FHF1 and FHF4 sequences  
170 was identified. Altogether, these observations confirm that FHF2-VY is the predominant FHF isoform in  
171 mouse left ventricular Na<sub>v</sub>1.5 channel complexes, and suggest minor representations of FHF2-Y, FHF1  
172 and/or FHF4 isoforms.

173 Among these 166 total FHF2 peptides, 62 peptides were phosphorylated at single or double  
174 positions, which represents more than a third of detected FHF2 peptides (**Table 1 & Table Supplement**  
175 **1**). The annotation of MS/MS spectra obtained for each phosphopeptide allowed the unambiguous  
176 identification of nine phosphorylation sites on the FHF2 protein at positions S35, S38, S218, S230, T232,  
177 S238, S240, S250 and T255 (**Figure 1A**). **Table 1** lists the phosphopeptides enabling the best  
178 phosphorylation site assignment(s) for each phosphorylation site. The identification of the two N-terminal  
179 phosphorylation sites at positions S35 and S38 arises from 2 (6 total) phosphopeptides specific for FHF2-  
180 VY and 3 (16 total) phosphopeptides common to FHF2-VY and FHF2-Y, suggesting that these N-  
181 terminal phosphosites are localized on the most represented ventricular FHF2-VY isoform. Interestingly,

## Regulation of Na<sub>v</sub>1.5 by FHF2 phosphorylation

182 the phosphorylation site at position S218 is conserved across all mouse FHF (1-4) isoforms, as well as the  
183 human FHF1-A and FHF1-B isoforms, while the six C-terminal FHF2 phosphorylation sites are specific  
184 for the mouse FHF2 isoforms. It is also interesting to note that, excluding S218, these phosphosites are  
185 clustered by two, which may indicate concomitant phosphorylation and involvement in a shared  
186 regulation.

187 Concordantly to the large number of detected phosphorylated, compared to non-phosphorylated,  
188 FHF2 peptides, further label-free quantitative analysis of the areas of extracted MS1 peptide ion  
189 chromatograms demonstrated a greater relative abundance of phosphorylated FHF2 peptides (summed  
190 area=1.6E+09 AU), compared to non-phosphorylated FHF2 peptides (summed area=1.5E+08 AU, **Figure**  
191 **1B**). This analysis also revealed large differences in the relative abundance of individual FHF2  
192 phosphopeptides. While phosphorylation at position S218 is the most abundant (area=1.4E+09 AU),  
193 followed by phosphorylation at S35-38 (area=2.0E+08 AU), phosphorylation at the six C-terminal sites at  
194 positions S250-255 (area=1.6E+07 AU), S230-232 (area=5.9E+06 AU) and S238-240 (area=1.6E+06 AU)  
195 is less represented. Noteworthy, the phosphorylated peptides assigning S35-38, S218 and S230-232 are  
196 more abundant than their non-phosphorylated counterparts, suggesting that these sites are mostly  
197 phosphorylated in mouse left ventricular Na<sub>v</sub>1.5 channel complexes. Taken together, these quantitative  
198 phosphoproteomic analyses identified nine phosphorylation sites on FHF2-VY from mouse left  
199 ventricular Na<sub>v</sub>1.5 channel complexes, among which one site at position S218 is conserved across FHF  
200 isoforms and species, and three sites at positions S35, S38 and S218 are heavily phosphorylated in mouse  
201 left ventricles.

202

### 203 **FHF2 knockdown and rescue in neonatal and adult mouse ventricular cardiomyocytes**

204 In order to investigate the roles of newly-identified FHF2 phosphorylation sites in regulating the  
205 expression and/or function of the cardiac Na<sub>v</sub>1.5 channels, two models were developed in freshly isolated  
206 neonatal and adult mouse ventricular cardiomyocytes, and the voltage-gated Na<sup>+</sup> currents were analyzed  
207 by whole-cell voltage-clamp recordings. Neonatal ventricular cardiomyocytes were isolated from wild-



## Regulation of Na<sub>v</sub>1.5 by FHF2 phosphorylation

208 type (WT) mouse pups, and adult ventricular cardiomyocytes were isolated from cardiac specific FHF2-  
209 knockdown (FHF2-KD) or control FHF2-lox adult mice (Angsutararux et al., Under revision for  
210 resubmission). The knockdown of FHF2 expression in neonatal WT cardiomyocytes was obtained in  
211 culture using FHF2 shRNA-expressing adenoviruses, and was compared directly to cardiomyocytes  
212 exposed to adenoviruses expressing control shRNA. The expression of FHF2 in both neonatal and adult  
213 cardiomyocytes was then rescued using adenoviruses expressing the FHF2-VY isoform, which is the  
214 predominant FHF isoform expressed in adult mouse left ventricles (Wang et al., 2011a), in its WT,  
215 phosphosilent or phosphomimetic forms at specific site(s). Note that the human FHF2-VY cDNA  
216 sequence was used in these rescue experiments as it only differs from one amino acid (leucine 146)  
217 compared to the mouse sequence (histidine 146). With the exception of the S218 phosphosite which was  
218 mutated individually, all the other FHF2 phosphosites were mutated and analyzed by clusters of two (35-  
219 38, 230-232, 238-240 and 250-255) as indicated by the black boxes in **Figure 1A**. In the phosphosilent  
220 constructs, mutations were introduced to replace serine(s)/threonine(s) (S/T) with alanines (A), whereas in  
221 the phosphomimetic constructs, mutations were introduced to substitute glutamate(s) (E) for  
222 serine(s)/threonine(s), to mimic phosphorylation. An additional adenovirus expressing FHF2-VY  
223 phosphosilent at the nine identified sites (FHF2-VY-9A) was also generated and used as a rescue.

224 Quantitative RT-PCR analyses of the four FHF genes and the five FHF2 isoforms (FHF2-VY, -V,  
225 -Y, -A and -B) as well as FHF2 western blot analyses were performed to verify the specific knockdown  
226 and rescue of FHF2 in the two cardiomyocyte models. As illustrated in **Figure 2A**, the application of  
227 FHF2 shRNA-expressing adenoviruses on neonatal mouse ventricular cardiomyocytes allowed ~90%  
228 knockdown of the transcripts encoding the FHF2-VY, FHF2-V and FHF2-A isoforms ( $p < 0.0001$ ),  
229 whereas no significant changes in the expression of FHF1, FHF2-Y and FHF4 transcripts were obtained.  
230 Consistent with previous reports (Wang et al., 2011a), the transcript expression of the FHF2-B and FHF3  
231 isoforms were not detected in neonatal and adult mouse ventricular cardiomyocytes (data not shown).  
232 Accordingly, western blot analyses showed 99% knockdown in FHF2 protein expression ( $p < 0.01$ ) in  
233 FHF2, compared to control, shRNA-treated cardiomyocytes (**Figures 2C & 2D**). A similar knockdown in

## Regulation of Na<sub>v</sub>1.5 by FHF2 phosphorylation

234 FHF2 protein expression was reached in ventricular cardiomyocytes isolated from FHF2-KD, compared  
235 to FHF2-lox, adult mice (**Figure 2F**). The expression of FHF2 was then rescued simultaneously using  
236 adenoviruses expressing the human FHF2-VY isoform in its WT, phosphosilent or phosphomimetic  
237 forms. The results from quantitative RT-PCR analyses showed that the transcript expression of the  
238 rescued human FHF2-VY constructs is in average 2- to 3-fold greater than the endogenous mouse FHF2  
239 transcript expression (**Figure 2B**). No direct comparison of the endogenous mouse and rescued human  
240 FHF2 protein expression could be performed because the anti-FHF2 antibodies used only allowed the  
241 specific and exclusive detection of the mouse or the human FHF2 proteins (data not shown). Additionally,  
242 although the averaged rescued FHF2-VY transcript expression varied between the different adenovirus  
243 constructs, from 1.7- (for FHF2-VY-250-255E) to 5.4- (for FHF2-VY-35-38E) fold the level of  
244 endogenous FHF2-VY expression (**Figure 2B**), no significant differences in expression were observed  
245 between the WT and the different phosphosilent or phosphomimetic FHF2-VY rescued proteins (**Figure**  
246 **2G**), suggesting that the observed differences in rescued transcript expression are inherent to experimental  
247 variability. Unexpectedly, however, the FHF2-VY-9A rescue demonstrated a substantial increase in  
248 transcript (8.6-fold, **Figure 2B**) and protein (3-fold, **Figure 2E**) expression, compared with the other WT  
249 or phosphomutant FHF2 adenoviral constructs, an observation that was also apparent when transfected  
250 using a plasmid vector in heterologous expression system (data not shown). Altogether, therefore, these  
251 molecular analyses validated our ability to manipulate the expression of endogenous and rescued FHF2  
252 proteins, and thus, the possibility to examine the effects of FHF2 phosphorylation using phosphosilent or  
253 phosphomimetic FHF2-VY constructs in both neonatal and adult mouse ventricular cardiomyocytes.

254

### 255 **Regulation of Na<sub>v</sub>1.5 channels by FHF2 knockdown and rescue in neonatal mouse**

#### 256 **ventricular cardiomyocytes**

257 The density, voltage-dependence and kinetic properties of voltage-gated Na<sup>+</sup> (Na<sub>v</sub>) currents (I<sub>Na</sub>)  
258 following the knockdown and rescue of FHF2 were evaluated in neonatal mouse ventricular  
259 cardiomyocytes 48 hours after adenoviral infection using whole-cell voltage-clamp analyses. As

## Regulation of Na<sub>v</sub>1.5 by FHF2 phosphorylation

260 illustrated in **Figure 3B**, and consistent with previous studies in other cardiomyocyte models (Wang et  
261 al., 2011a; Hennessey et al., 2013; Park et al., 2016; Wang et al., 2017; Santucci et al., 2022), these  
262 analyses showed that the knockdown of FHF2 significantly ( $p < 0.0001$ ) shifts the voltage-dependence of  
263 steady-state I<sub>Na</sub> inactivation towards hyperpolarized potentials, compared to cardiomyocytes exposed to  
264 control shRNA-expressing adenoviruses (see distributions at -10 mV, detailed properties and statistics in  
265 **Figure 4B & Table 2**). Consistent with this effect on channel inactivation from closed state, an  
266 acceleration of the kinetics of inactivation from open state was also observed upon FHF2 knockdown  
267 (**Figures 3A & 3E**), with a significant ( $p < 0.001$ ) decrease in the time constant of fast inactivation ( $\tau_{fast}$ ,  
268 **Figures 3F & 4D**) and an increase ( $p < 0.01$ ) in the proportion of fast to slow inactivation components  
269 ( $A_{fast}/A_{slow}$ , **Figures 3H & 4F**). No significant differences in the time constant of slow inactivation ( $\tau_{slow}$ ,  
270 **Figures 3G & 4E**), peak I<sub>Na</sub> density (**Figures 3A, 3D & 4C**), time to peak I<sub>Na</sub>, or time for recovery from  
271 inactivation were observed upon FHF2 knockdown (**Table 2**). Interestingly, these analyses also revealed  
272 for the first time that the knockdown of FHF2 induces a significant ( $p < 0.001$ ) shift in the voltage-  
273 dependence of channel activation towards hyperpolarized potentials (**Figures 3C, 4A & Table 2**).  
274 Noteworthy, while the rescue of FHF2 expression with the WT FHF2-VY isoform partially, but  
275 significantly restored the Na<sub>v</sub> channel inactivation properties from both closed (**Figures 3B, 4B & Table**  
276 **2**) and open (**Figures 3A, 3E, 3F, 3H, 4D, 4F & Table 2**) states, no rescue of the activation properties  
277 was obtained (**Figures 3C, 4A & Table 2**). Together, therefore, these electrophysiological analyses  
278 suggest that an additional FHF2 isoform contributes, with FHF2-VY, to the regulation of both the  
279 activation and inactivation properties of neonatal mouse ventricular Na<sub>v</sub>1.5 channels.

280 To decipher the roles of the newly-identified FHF2 phosphorylation sites in regulating the cardiac  
281 Na<sub>v</sub>1.5 channels, the expression of FHF2 was then rescued in neonatal mouse ventricular cardiomyocytes  
282 with the different FHF2-VY phosphomutant adenoviruses, and I<sub>Na</sub> properties and densities were compared  
283 to those obtained with the WT FHF2-VY rescue. Importantly, the phosphosilent and phosphomimetic  
284 constructs for each phosphosite subgroup were compared directly to the WT FHF2-VY rescue obtained  
285 on the same days of patch-clamp analyses, and for the sake of clarity, a single representative subset of this

## Regulation of Na<sub>v</sub>1.5 by FHF2 phosphorylation

286 later condition was chosen and presented in **Figure 4** and **Table 2**. To our surprise, however, no  
287 significant differences in the voltage-dependence, kinetic properties or peak I<sub>Na</sub> densities were obtained  
288 for any of the ten phosphosilent or phosphomimetic FHF2-VY constructs, compared to the WT FHF2-VY  
289 rescue. A FHF2-VY construct phosphosilent at the nine identified phosphorylation sites was thus  
290 generated, but did not allow either detecting any significant changes in I<sub>Na</sub> properties or density, compared  
291 to the WT FHF2-VY rescue. Together, therefore, no roles for the newly-identified FHF2 phosphorylation  
292 sites in regulating neonatal mouse ventricular Na<sub>v</sub>1.5 channels could be revealed, notwithstanding the  
293 multiple subgroup mutations tested. Interestingly, however, these electrophysiological analyses  
294 demonstrate for the first time that, in addition to their recognized function in regulating Na<sub>v</sub>1.5 channel  
295 inactivation properties, the FHF2 isoforms also regulate the voltage-dependence of Na<sub>v</sub>1.5 channel  
296 activation in neonatal mouse ventricular cardiomyocytes.

297

### 298 **Regulation of Na<sub>v</sub>1.5 channels by FHF2 knockdown and rescue in adult mouse ventricular** 299 **cardiomyocytes**

300 One possibility accounting for the absence of differences in the rescues of I<sub>Na</sub> properties with the  
301 different phosphomutant, compared to WT, FHF2-VY constructs in neonatal mouse ventricular  
302 cardiomyocytes could arise from the fact that the FHF2 phosphorylation sites were identified from adult  
303 mouse left ventricles, which may differ from the FHF2 phosphorylation sites and/or the overall Na<sub>v</sub>1.5  
304 channel complex and regulation involved in neonatal cardiomyocytes. In this respect, therefore, the same  
305 electrophysiological analyses were designed in ventricular cardiomyocytes isolated from FHF2-KD (and  
306 control FHF2-lox) adult mice (Angsutararux et al., Under revision for resubmission), 48 hours following  
307 culture and infection with the different phosphomutant (or WT) FHF2-VY adenoviruses. Similar to  
308 findings obtained in neonatal cardiomyocytes, as well as in adult cardiomyocytes isolated from the same  
309 mouse lines in the Silva laboratory (Angsutararux et al., Under revision for resubmission), the knockdown  
310 of FHF2 in adult mouse ventricular cardiomyocytes significantly increases the rate of Na<sub>v</sub> channel  
311 inactivation from both closed (**Figure 5B**) and open (**Figures 5A & 5E**) states. Hence, the membrane

## Regulation of Na<sub>v</sub>1.5 by FHF2 phosphorylation

312 potential of half-inactivation ( $V_{1/2}$ , **Figures 5B & 6B**), the time constant of fast inactivation ( $\tau_{fast}$ , **Figures**  
313 **5F & 6D**), and the proportion of fast to slow inactivation components ( $A_{fast}/A_{slow}$ , **Figures 5H & 6F**) were  
314 significantly ( $p<0.0001$ ) changed between FHF2-KD and FHF2-lox cardiomyocytes (see distributions at -  
315 20 mV, detailed properties and statistics in **Figure 6 & Table 3**). However, contrary to findings obtained  
316 in neonatal cardiomyocytes, these analyses demonstrated the exclusive role of the FHF2-VY isoform in  
317 these effects in adult cardiomyocytes as all the Na<sub>v</sub> channel inactivation properties changed with the  
318 FHF2 knockdown were completely restored by the WT FHF2-VY isoform. Additionally, the voltage-  
319 dependence of Na<sub>v</sub> channel activation was not regulated by the knockdown or rescue of FHF2 expression  
320 (**Figures 5C & 6A**), which is consistent with the sole involvement of the FHF2-VY isoform in regulating  
321 Na<sub>v</sub>1.5 channels in these cells. Interestingly, however, the rescue of FHF2 expression with the WT FHF2-  
322 VY isoform significantly ( $p<0.0001$ ) increases the density of the peak Na<sup>+</sup> current, while no changes were  
323 observed in FHF2-KD, compared to FHF2-lox, cardiomyocytes (**Figures 5A, 5D, 6C & Table 3**).

324 The roles of FHF2 phosphorylation sites were then explored in this adult mouse ventricular  
325 cardiomyocyte model using the different phosphosilent or phosphomimetic FHF2-VY adenoviruses.  
326 Similar to results obtained in neonatal cardiomyocytes, however, we were unable to detect any significant  
327 differences in  $I_{Na}$  densities or properties between the different phosphomutant and the WT adenoviral  
328 rescues, including with the FHF2-VY-9A rescue (**Figure 6 & Table 3**), preventing to identify any roles  
329 for FHF2 phosphorylation sites in regulating Na<sub>v</sub>1.5 channels.

330 Because it was previously shown that FHF2 also plays a crucial role in regulating the late Na<sup>+</sup>  
331 current ( $I_{NaL}$ ) (Abrams et al., 2020; Gade et al., 2020; Chakouri et al., 2022), additional voltage-clamp  
332 experiments were designed to investigate whether the simultaneous mutation of the nine identified FHF2  
333 phosphorylation sites to alanine, using the FHF2-VY-9A phosphomutant rescue, affects the density of  
334 TTX-sensitive  $I_{NaL}$  in adult mouse ventricular cardiomyocytes. In accordance with previous studies, these  
335 analyses demonstrated that the averaged  $I_{NaL}$  density is significantly ( $p<0.05$ ) increased in FHF2-KD,  
336 compared to FHF2-lox, cardiomyocytes (**Table 4**). Similar to the other Na<sub>v</sub> current inactivation

## Regulation of Na<sub>v</sub>1.5 by FHF2 phosphorylation

337 properties, however, comparable rescues in I<sub>NaL</sub> density were obtained with the FHF2-VY-WT and FHF2-  
338 VY-9A adenoviruses.

339 Together with the electrophysiological findings in neonatal cardiomyocytes, therefore, these  
340 analyses demonstrate the exclusive role of the FHF2-VY isoform in regulating the Na<sub>v</sub>1.5 channel  
341 inactivation properties from closed and open states in adult mouse ventricular cardiomyocytes, and  
342 suggest the involvement of an additional FHF2 isoform in regulating both the activation and inactivation  
343 properties of Na<sub>v</sub>1.5 channels in neonatal mouse ventricular cardiomyocytes. Unexpectedly, however, no  
344 roles for the newly-identified FHF2 phosphorylation sites could be identified in the regulation of either  
345 neonatal or adult cardiac Na<sub>v</sub>1.5 channels.

346

### 347 **Differential transcript and protein expression of FHF2 isoforms in neonatal and adult** 348 **mouse ventricular cardiomyocytes**

349 In order to investigate the possible differences that could impart the observed distinctive effects  
350 of FHF2 knockdown and rescue on neonatal and adult ventricular Na<sub>v</sub>1.5 channels, further experiments  
351 were undertaken to examine the expression of the various FHF2 isoforms in freshly isolated neonatal and  
352 adult mouse ventricular cardiomyocytes. Quantitative RT-PCR analyses using isoform-specific primers  
353 demonstrated a greater ( $p<0.01$ ) expression of the FHF2-VY isoform in adult, compared to neonatal,  
354 cardiomyocytes (**Figure 2H**). Conversely, and of potential interest in the differential regulation of  
355 neonatal Na<sub>v</sub>1.5 channels, a significant ( $p<0.01$ ) higher expression of the FHF2-Y and FHF2-A isoforms  
356 was measured in neonatal, compared to adult, cardiomyocytes. Although direct comparison of relative  
357 expression of different transcripts could not reliably be achieved using the employed relative quantitative  
358 RT-PCR method, it is interesting to underscore that the FHF2-VY isoform is ~10-fold more abundant  
359 than the three other FHF2 isoforms combined in adult cardiomyocytes, a result consistent with the  
360 exclusive mass spectrometric identification of peptides specific for the FHF2-VY (or FHF2-Y) N-  
361 terminus (**Figure 1A and Table Supplement 1**). In neonatal cardiomyocytes, however, the expression  
362 levels of the FHF2-VY and FHF2-A isoforms are similar and ~6- to ~30-fold greater than FHF2-V and

## Regulation of Na<sub>v</sub>1.5 by FHF2 phosphorylation

363 FHF2-Y, respectively (**Figure 2H**). Remember here, nonetheless, that the FHF2-Y isoform is not of  
364 interest in the context of the mechanisms explored in the present electrophysiological analyses from  
365 neonatal cardiomyocytes as the expression of this particular isoform is not modulated by the FHF2  
366 knockdown in these cells (**Figure 2A**). These findings thus leave the FHF2-A isoform as the sole  
367 potential FHF2 candidate responsible for the differential FHF2-dependent regulation of neonatal,  
368 compared to adult, Na<sub>v</sub>1.5 channels. Consistent with these findings in transcript expression, the use of an  
369 antibody specific for the FHF2-A isoform in western blot analyses demonstrated that FHF2-A is  
370 expressed in neonatal mouse ventricular cardiomyocytes, whereas no expression could be detected in  
371 adult mouse ventricular cardiomyocytes (**Figure 2I**). Together with the electrophysiological and mass  
372 spectrometric findings, therefore, these molecular analyses suggest that the FHF2-dependent regulation of  
373 Na<sub>v</sub>1.5 channels in adult mouse ventricular cardiomyocytes is exclusively mediated by the FHF2-VY  
374 isoform, while the FHF2-VY and FHF2-A isoforms share the regulation of neonatal Na<sub>v</sub>1.5 channels.

375

376

377

378

379

380

381

382

383

384

385

386

387

388



389 **Discussion**

390 The results presented here provide the first phosphorylation map of the FHF2 protein isolated  
391 from native mouse left ventricular Na<sub>v</sub>1.5 channel complexes. Although no functional roles for the nine  
392 newly-identified FHF2 phosphorylation sites in the regulation of the expression or gating properties of  
393 Na<sub>v</sub>1.5-encoded channels could be recognized in the present study, the use of two distinct ventricular  
394 cardiomyocyte models from neonatal and adult mice revealed a differential FHF2-dependent regulation of  
395 Na<sub>v</sub>1.5 channels through the developing and adult mouse hearts. While the FHF2-VY isoform appears to  
396 be the sole FHF2 isoform involved in regulating the inactivation properties of Na<sub>v</sub>1.5 channels in adult  
397 mouse ventricular cardiomyocytes, our findings concur to the suggestion that both the FHF2-VY and  
398 FHF2-A isoforms share the regulation of Na<sub>v</sub>1.5 channel inactivation and activation properties in  
399 neonatal mouse ventricular cardiomyocytes.

400

401 **Expression and representation of FHF2 isoforms in Na<sub>v</sub>1.5 channel complexes in neonatal**  
402 **and adult mouse ventricular cardiomyocytes**

403 Consistent with previous studies (Wang et al., 2011a), our mass spectrometric and transcript  
404 expression analyses confirmed that, out of the 4 FHF genes and the five distinct FHF2 isoforms generated  
405 by N-amino terminus alternative splicing (FHF2-VY, -V, -Y, -A and -B) reported before (Munoz-Sanjuan  
406 et al., 2000), the expression of the FHF2-VY isoform is preponderant in adult mouse ventricular  
407 cardiomyocytes, while the FHF2-B and FHF3 isoforms are not detected in either neonatal or adult mouse  
408 ventricular cardiomyocytes. Additionally, the present transcript expression findings are consistent with a  
409 differential expression of the FHF2 isoforms through the developing and adult mouse hearts, with adult  
410 mouse ventricular cardiomyocytes expressing mainly the FHF2-VY isoform, and neonatal  
411 cardiomyocytes bearing both FHF2-VY and FHF2-A. Importantly, the differential transcript expression  
412 profile of the FHF2-A isoform observed in neonatal and adult mouse ventricular cardiomyocytes was  
413 confirmed at the protein level by western blot showing specific or no FHF2-A bands in neonatal and adult  
414 samples, respectively. Altogether, therefore, these expression analyses using different technical



## Regulation of Na<sub>v</sub>1.5 by FHF2 phosphorylation

415 approaches suggest that FHF2-VY is the unique FHF isoform represented in adult mouse ventricular  
416 Na<sub>v</sub>1.5 channel complexes, while the neonatal Na<sub>v</sub>1.5 channel complexes comprise both the FHF2-VY  
417 and FHF2-A isoforms.

418

### 419 **Proteomic and functional mapping of mouse left ventricular FHF2-VY phosphorylation** 420 **sites**

421 The present phosphoproteomic analysis confidently identified a total of nine novel native  
422 phosphorylation sites in the FHF2 protein purified from adult mouse left ventricular Na<sub>v</sub>1.5 channel  
423 complexes. Three of these sites, at positions S35, S38 and S218 are heavily phosphorylated in mouse left  
424 ventricles. Interestingly, the S218 phosphosite is conserved across all FHF isoforms and species, while  
425 the two N-terminal phosphosites at positions S35 and S38 are specific for FHF2-VY and FHF2-Y.  
426 Having established that the transcript expression level of the FHF2-VY isoform is predominant in adult  
427 mouse ventricular cardiomyocytes, especially compared to the much lower expression of FHF2-Y, these  
428 two N-terminal phosphosites have most likely been detected from the FHF2-VY isoform. In contrast, the  
429 six other, C-terminal FHF2 sites, at positions S230, T232, S238, S240, S250 and T255 are common to the  
430 five FHF2 isoforms, are less abundantly phosphorylated, and show a much lower stoichiometry compared  
431 to the N-terminal and S218 phosphosites. The simplest interpretation of these differences in phosphosite  
432 abundance and stoichiometry is that the first group may contribute to the basal FHF2-dependent  
433 regulatory mechanisms of cardiac Na<sub>v</sub>1.5 channels, while the later may participate in more local or  
434 temporary roles. While the Laezza group identified three phosphoserines on FHF4, at positions S226,  
435 S228 and S230 (Hsu et al., 2016; Hsu et al., 2017), no alignment of these three phosphoserines with the  
436 newly-identified FHF2 phosphoserines here could be obtained as the surrounding amino acid sequences  
437 are not conserved (**Figure 1A**). Additionally, while phosphorylation at Y158 was previously identified in  
438 FHF4 using *in silico* and *in vitro* analyses (Wadsworth et al., 2020), no phosphorylation was detected at  
439 the corresponding conserved FHF2 tyrosine in the present mass spectrometric analysis, likely reflecting

## Regulation of Na<sub>v</sub>1.5 by FHF2 phosphorylation

440 the distinctly low level of tyrosine phosphorylation compared with phosphoserines and  
441 phosphothreonines, tissue specificity and/or differences between *in situ* and *in silico/in vitro* approaches.  
442 With the exception of the S218 phosphosite which is more isolated in the FHF2 amino acid  
443 primary sequence, the distribution of phosphosites by clusters of two led us to investigate the functional  
444 roles of these sites by four clusters of two phosphosilent or phosphomimetic mutations (35-38, 230-232,  
445 238-240 and 250-255). To our surprise, however, no differential effects in the regulation of Na<sub>v</sub>1.5  
446 channel expression or biophysical properties could be revealed with the different phosphomutant,  
447 compared to WT, FHF2-VY rescues in both neonatal and adult mouse ventricular cardiomyocyte models.  
448 A complete phosphosilent FHF2-VY construct in which the nine phosphosites were mutated to alanine  
449 (FHF2-VY-9A) was therefore generated, but did not allow either revealing any roles for FHF2  
450 phosphorylation in regulating cardiac Na<sub>v</sub>1.5 channels. Although the reasons for this absence of positive  
451 findings are uncertain, especially for the FHF2-VY-9A phosphosilent mutant, three possible and non-  
452 exclusive scenarios could be incriminated. The regulation of Na<sub>v</sub>1.5 by phosphorylation of FHF2 could  
453 depend, as for the regulation of many protein interactions, on two distinct, direct or allosteric  
454 mechanisms. The most plausible reason, involving the more direct mechanism, may be linked to the  
455 supra-physiological levels of rescued FHF2 proteins (in average 2- to 3-fold, and 9-fold greater for FHF2-  
456 VY-9A, compared to endogenous FHF2), which may compensate for a potential loss in FHF2 interaction  
457 with the channel. Another, likely reason may be associated with the combinations of phosphosite  
458 mutations tested, which may not reflect the exact combinations of sites involved in specific channel  
459 regulations. Last, but not least, these two cardiomyocyte models, although native, may be missing some  
460 *sine qua none* molecular details involved in specific FHF2-dependent regulations, such as the activation  
461 of particular signaling pathways or kinases, therefore preventing engagement of analyzed phosphosites in  
462 specific regulatory mechanisms. Similarly, additional FHF2 phosphosites may have been lost during  
463 sample preparation and therefore not detected by mass spectrometry, which may have cancelled the  
464 occurrence of regulatory mechanisms. Although unfortunate, it is likely, however, based on the great  
465 number, abundance and/or stoichiometry of identified native FHF2 phosphosites, as well as on the

## Regulation of Na<sub>v</sub>1.5 by FHF2 phosphorylation

466 previously recognized roles of phosphorylation in regulating FHF4-Na<sub>v</sub> interaction and neuronal Na<sub>v</sub>  
467 channel function (Shavkunov et al., 2013; James et al., 2015; Wildburger et al., 2015; Hsu et al., 2016;  
468 Hsu et al., 2017; Wadsworth et al., 2020), that the phosphorylation of FHF2 does play specific roles in  
469 regulating cardiac Na<sub>v</sub>1.5 channel physiology. Altogether, these notwithstanding results demonstrate that  
470 native mouse left ventricular FHF2-VY is highly phosphorylated at nine specific sites, and that the  
471 regulation of Na<sub>v</sub>1.5-encoded channels by FHF2 phosphorylation most certainly contributes to variable  
472 Na<sub>v</sub>1.5 expressivity in a highly complex manner. Further different approaches, therefore, taking the  
473 present study limitations into account, must warrant future investigations.

474

### 475 **FHF2 affects cardiac Na<sub>v</sub> current properties and density in an age-specific manner**

476 The study took advantage of the use of two distinct ventricular cardiomyocyte models,  
477 respectively from neonatal and adult mice, to explore the extent to which the diversity and differential  
478 expression of FHF2 isoforms may distinctly participate in the regulation of Na<sub>v</sub>1.5 channels through the  
479 developing and adult mouse hearts. In agreement with previous studies (Wang et al., 2011a; Park et al.,  
480 2016; Wang et al., 2017; Santucci et al., 2022), the effects of FHF2 knockdown and rescue on Na<sub>v</sub> current  
481 properties herein observed demonstrate that the FHF2-VY isoform is preponderant, not to say the sole  
482 FHF2 isoform involved in regulating the Na<sub>v</sub>1.5 channel inactivation properties, facilitating inactivation  
483 from both closed and open states, in adult mouse ventricular cardiomyocytes. The present study also  
484 confirms the role of FHF2-VY in decreasing the late Na<sup>+</sup> current in adult mouse ventricular  
485 cardiomyocytes. A differential regulation schema, however, implying not only the inactivation, but also  
486 the activation properties was observed in neonatal mouse ventricular cardiomyocytes. Based on  
487 differences in FHF2 isoform expression patterns in neonatal and adult mouse ventricular cardiomyocytes,  
488 it is tempting to speculate that both FHF2-VY and FHF2-A isoforms participate in the regulation of  
489 neonatal Na<sub>v</sub>1.5 channels. This conclusion, nonetheless, cannot be definitive as other differences may  
490 also exist and explain this differential regulation. It is possible, for example, that FHF2-VY does not exert  
491 the same effects on neonatal and adult Na<sub>v</sub>1.5 channel isoforms (Onkal et al., 2008). Alternatively, the

## Regulation of Na<sub>v</sub>1.5 by FHF2 phosphorylation

492 FHF2 knockdown in neonatal cardiomyocytes may change some other channel regulatory components  
493 that are differential and therefore affect channel functioning differently compared to adult cells.  
494 Whichever schema involved, these studies lead to the conclusion that the FHF2 isoforms are robust  
495 cellular factors in controlling the inactivation properties of Na<sub>v</sub>1.5 channels in both neonatal and adult  
496 mouse ventricular cardiomyocytes, whereas their role in regulating channel activation in neonatal  
497 cardiomyocytes, whether in a direct or indirect manner, would rather be secondary compared to more  
498 prevalent cellular factors. Although the diversity of the roles of the FHF2 isoforms, including FHF2-A, in  
499 regulating Na<sub>v</sub> channels has previously been queried in several heterologous expression systems, as well  
500 as in dorsal root ganglion neurons or derived cells, no specific roles for FHF2-A have been attributed in  
501 the regulation of Na<sub>v</sub> channel activation (Rush et al., 2006; Yang et al., 2016; Effraim et al., 2019). The  
502 most consistent finding from these studies demonstrated that FHF2-A hastens the rate of Na<sub>v</sub> channel  
503 entry into the slow inactivation state and induces a dramatic slowing of recovery from inactivation,  
504 resulting in a large current decrease upon repetitive stimulations at both low and high frequencies.  
505 Together with these previous studies, therefore, the present findings suggest that this newly-identified  
506 function for FHF2-A in regulating the voltage-dependence of Na<sub>v</sub> channel activation is most likely  
507 specific to the regulation of neonatal mouse ventricular Na<sub>v</sub>1.5 channels.

508 Another difference between neonatal and adult cardiomyocytes in the FHF2-dependent regulation  
509 of Na<sub>v</sub>1.5 channels concerns the increase in peak Na<sup>+</sup> current density observed upon the FHF2 rescue in  
510 adult mouse ventricular cardiomyocytes. This finding is in a way surprising because no concordant  
511 decreased current was observed upon the FHF2 knockdown, in neither cardiomyocyte models, but is  
512 nonetheless consistent with previous studies reporting a role for FHF2 in regulating the cell surface  
513 expression of Na<sub>v</sub>1.5 channels (Wang et al., 2011a; Hennessey et al., 2013; Yang et al., 2016; Wang et  
514 al., 2017). In the context of the present interpretation, it is important to stress here that the expression of  
515 the rescued FHF2-VY isoforms is 2- to 3-fold greater, compared to endogenous FHF2 expression level,  
516 which may bring, by mass action, more channels to the cell surface, and therefore increase the peak Na<sup>+</sup>

## Regulation of Na<sub>v</sub>1.5 by FHF2 phosphorylation

517 current. Therefore, although not congruent in the literature, this novel demonstration does infer a role for  
518 FHF2-VY in the regulation of cardiac Na<sub>v</sub>1.5 channel cell surface expression.

519 In summary, our data demonstrate that ventricular FHF2 is highly phosphorylated at specific  
520 sites, and that the two main mouse ventricular FHF2 isoforms are key Na<sub>v</sub>1.5 channel regulatory proteins  
521 that influence membrane excitability through age- and cell environment-specific mechanisms. These  
522 novel demonstrations add to the overall suggestion that a complex and specific orchestration of regulation  
523 contributes to variable Na<sub>v</sub>1.5 expression and function in distinct channel complexes and contexts, and  
524 give rise to the unappreciated roles of post-translational modifications and isoform diversity in providing  
525 bases for physiological or pathological differences in Na<sup>+</sup> current.

526

527

528

529

530

531

532

533

534

535

536

537

538

539

540

541

542

543 **Materials and methods**

544 **Statement on the use of murine tissue**

545 All investigations conformed to directive 2010/63/EU of the European Parliament, to the Guide  
546 for the Care and Use of Laboratory Animals published by the US National Institutes of Health (NIH  
547 Publication No. 85-23, revised 1985) and to local institutional guidelines.

548

549 **Immunoprecipitation of Na<sub>v</sub> channel complexes**

550 Immunoprecipitation (IP) of Na<sub>v</sub> channel complexes from mouse left ventricles was performed  
551 as described previously (Lorenzini et al., 2021). Briefly, flash-frozen left ventricles from 13-weeks-old  
552 male C57/BL6J wild-type (WT) mice were homogenized individually in ice-cold lysis buffer containing  
553 20 mM HEPES (pH 7.4), 150 mM NaCl, 0.5% amidosulfobetaine, 1X complete protease inhibitor  
554 cocktail tablet, 1 mM phenylmethylsulfonyl fluoride (PMSF), 0.7 µg/ml pepstatin A (Thermo Fisher  
555 Scientific, Waltham, MA) and 1X Halt phosphatase inhibitor cocktail (Thermo Fisher Scientific). All  
556 reagents were from Sigma-Aldrich (Saint Louis, MO) unless otherwise noted. After 15-minutes rotation  
557 at 4°C, 8 mg of the soluble protein fractions were pre-cleared with 200 µL of protein G-magnetic  
558 Dynabeads (Thermo Fisher Scientific) for 1 hour, and subsequently used for IP with 48 µg of an anti-  
559 Na<sub>v</sub>PAN mouse monoclonal antibody (mαNa<sub>v</sub>PAN, Sigma-Aldrich, #S8809), raised against the SP19  
560 epitope (Vassilev et al., 1988) located in the third intracellular linker loop and common to all Na<sub>v</sub> channel  
561 pore-forming subunits. Prior to the IP, antibodies were cross-linked to 200 µl of protein G-magnetic  
562 Dynabeads using 20 mM dimethyl pimelimidate (Thermo Fisher Scientific) (Schneider et al., 1982).  
563 Protein samples and antibody-coupled beads were mixed for 2 hours at 4°C. Magnetic beads were then  
564 collected, washed rapidly four times with ice-cold lysis buffer, and isolated protein complexes were  
565 eluted from the beads in 1X SDS sample buffer (Bio-Rad Laboratories, Hercules, CA) at 60°C for 10  
566 minutes. Ninety-nine percent of the immunoprecipitated mouse left ventricular Na<sub>v</sub> channel protein

## Regulation of Na<sub>v</sub>1.5 by FHF2 phosphorylation

567 complexes were analyzed by MS, and the remaining one percent was used to verify Na<sub>v</sub>1.5 IP yields by  
568 western blotting.

569

### 570 **Peptide preparation and isobaric labeling for LC-MS**

571 The tryptic peptides from mouse left ventricular Na<sub>v</sub> channel complexes were generated and  
572 labeled as described previously (Lorenzini et al., 2021). Briefly, the IP eluates were thawed on ice,  
573 reduced, and denatured by heating for 10 min at 95°C. The Cys residues were alkylated with  
574 iodoacetamide (10 mM) for 45 min at room temperature in the dark. The peptides were prepared using a  
575 modification (Erde et al., 2014) of the filter-aided sample preparation method (Wisniewski et al., 2009).  
576 After the addition of 300 µL of 100 mM Tris buffer (pH 8.5) containing 8 M urea (UT) and vortexing, the  
577 samples were transferred to YM-30 filter units (Millipore, MRCF0R030) and spun for 14 min at 10,000  
578 rcf (Eppendorf, Model No. 5424). The filters were washed with 200 µl of UT buffer, and the spin-wash  
579 cycle was repeated twice. The samples were then exchanged into digest buffer with the addition of 200  
580 µL of 50 mM Tris buffer, pH 8.0, followed by centrifugation (10,000 rcf for 10 min). After transferring  
581 the upper filter units to new collection tubes, 80 µL of digest buffer was added, and the samples were  
582 digested with trypsin (1 µg) for 4 h at 37°C. The digestion was continued overnight after adding another  
583 aliquot of trypsin. The filter units were then spun for 10 min (10,000 rcf) in an Eppendorf  
584 microcentrifuge. The filter was washed with 50 µL of Tris buffer (100 mM, pH 8.0), followed by  
585 centrifugation. The digests were extracted three times with 1 ml of ethyl acetate, and acidified to 1%  
586 trifluoroacetic acid (TFA) using a 50% aqueous solution. The pH was < 2.0 by checking with pH paper.  
587 The solid phase extraction of the peptides was performed using porous graphite carbon micro-tips (Chen  
588 et al., 2012). The peptides were eluted with 60% acetonitrile in 0.1% TFA, and pooled for drying in a  
589 Speed-Vac (Thermo Fisher Scientific, Model No. Savant DNA 120 concentrator) after adding TFA to  
590 5%. The peptides were dissolved in 20 µL of 1% acetonitrile in water. An aliquot (10%) was removed for  
591 quantification using the Pierce Quantitative Fluorometric Peptide Assay kit (Thermo Fisher Scientific,  
592 Cat. No. 23290). The remainder of the peptides from each IP samples (~0.5-3.5 µg) and 1.16 µg of

## Regulation of Na<sub>v</sub>1.5 by FHF2 phosphorylation

593 reference pool peptide were transferred into a new 0.5 mL Eppendorf tube, dried in the Speed-Vac, and  
594 dissolved in 12  $\mu$ L of HEPES buffer (100 mM, pH 8.0, Sigma-Aldrich, H3537).

595 The samples were labeled with tandem mass tag reagents (TMT11, Thermo Fisher Scientific)  
596 according to manufacturer's protocol. The labeled samples were pooled, dried, and resuspended in 120  
597  $\mu$ L of 1% formic acid (FA). The TMT11 labeled sample was desalted as described above for the  
598 unlabeled peptides. The eluates were transferred to autosampler vials (Sun-Sri, Cat. No. 200046), dried,  
599 and stored at -80°C for capillary liquid chromatography interfaced to a mass spectrometer (nano-LC-MS).

600

### 601 **Nano-LC-MS**

602 The mass spectrometric analysis of mouse left ventricular Na<sub>v</sub> channel complexes was performed  
603 as described previously (Lorenzini et al., 2021). Briefly, the samples in formic acid (1%) were loaded (2.5  
604  $\mu$ L) onto a 75  $\mu$ m i.d.  $\times$  50 cm Acclaim<sup>®</sup> PepMap 100 C18 RSLC column (Thermo Fisher Scientific) on  
605 an EASY *nano*-LC (Thermo Fisher Scientific). The column was equilibrated using constant pressure (700  
606 bar) with 20  $\mu$ L of solvent A (0.1% FA). The peptides were eluted using the following gradient program  
607 with a flow rate of 300 nL/min and using solvents A and B (acetonitrile with 0.1% FA): solvent A  
608 containing 5% B for 1 min, increased to 25% B over 87 min, to 35% B over 40 min, to 70% B in 6 min  
609 and constant 70% B for 6 min, to 95% B over 2 min and constant 95% B for 18 min. The data were  
610 acquired in data-dependent acquisition (DDA) mode. The MS1 scans were acquired with the Orbitrap<sup>™</sup>  
611 mass analyzer over  $m/z = 375$  to 1500 and resolution set to 70,000. Twelve data-dependent high-energy  
612 collisional dissociation spectra (MS2) were acquired from each MS1 scan with a mass resolving power  
613 set to 35,000, a range of  $m/z = 100 - 1500$ , an isolation width of 2 Th, and a normalized collision energy  
614 setting of 32%. The maximum injection time was 60 ms for parent-ion analysis and 120 ms for product-  
615 ion analysis. The ions that were selected for MS2 were dynamically excluded for 20 sec. The automatic  
616 gain control (AGC) was set at a target value of 3e6 ions for MS1 scans and 1e5 ions for MS2. Peptide  
617 ions with charge states of one or  $\geq 7$  were excluded for higher-energy collision-induced dissociation  
618 (HCD) acquisition.



## Regulation of Na<sub>v</sub>1.5 by FHF2 phosphorylation

619

### 620 **MS data analysis**

621 Peptide identification from raw MS data was performed using PEAKS Studio 8.5 (Bioinformatics  
622 Solutions Inc., Waterloo, Canada) (Zhang et al., 2012). The Uni-mouse-Reference-20131008 protein  
623 database was used for spectral matching. The precursor and product ion mass tolerances were set to 20  
624 ppm and 0.05 Da, respectively, and the enzyme cleavage specificity was set to trypsin, with a maximum  
625 of three missed cleavages allowed. Carbamidomethylation (Cys) and TMT tags (Lys and/or peptide N-  
626 terminus) were treated as fixed modifications, while oxidation (Met), pyro-glutamination (Gln),  
627 deamidation (Asn and/or Gln), methylation (Lys and/or Arg), dimethylation (Lys and/or Arg), acetylation  
628 (Lys) and phosphorylation (Ser, Thr and/or Tyr) were considered variable modifications. The definitive  
629 annotation of each FHF2 phosphopeptide-spectrum match was obtained by manual verification and  
630 interpretation. The phosphorylation site assignments were based on the presence or absence of the  
631 unphosphorylated and phosphorylated b- and y-ions flanking the site(s) of phosphorylation, ions referred  
632 to as site-discriminating ions throughout this study. Peptide sequences, m/z, charge states, mass errors of  
633 parent ions (in ppm), PEAKS -10lgP and A scores, and charge state confirmations of site-discriminating  
634 b- and y-ions are presented in **Table Supplement 1 & Table 1**.

635 Label-free quantitative analysis of the areas of extracted MS1 chromatograms of phosphorylated  
636 and non-phosphorylated peptide ions covering the phosphorylation site(s) of interest was used to evaluate  
637 the proportion of phosphorylated to non-phosphorylated peptides at each position, as well as the relative  
638 abundance of phosphopeptides.

639

### 640 **Plasmids and adenoviruses**

641 The FHF2 and control shRNA sequences were subcloned behind an U6 promoter into the  
642 pDUAL-U6 plasmid (Vector Biolabs, Malvern, PA). The sequence for FHF2 shRNA was 5'-  
643 CAGCACTTACACTCTGTTTAA-CTCGAG-TTAAACAGAGTGTAAGTGCTG-3', which targets  
644 nucleotides corresponding to mouse FHF2-VY amino acids 106-113. The sequence for control shRNA

## Regulation of Na<sub>v</sub>1.5 by FHF2 phosphorylation

645 was 5'-GCGCGATAGCGCTAATAATTT-CTCGAG-AAATTATTAGCGCTATCGCGC-3', which does  
646 not correspond to any known sequence in the mouse genome. The FHF2-VY phosphomutant rescue  
647 constructs were generated by mutating the serine(s)/threonine(s) to alanine(s) (A) or glutamate(s) (E) by  
648 site-directed mutagenesis using the QuikChange II XL Site-Directed Mutagenesis kit (Agilent, Santa  
649 Clara, CA) of a pDUAL2-CCM(-) plasmid (Vector Biolabs, Malvern, PA) containing the CMV promoter  
650 in front of the human FHF2-VY cDNA (NCBI Reference Sequence NM\_001139500, full-length cDNA  
651 clone purchased from Origene, Rockville, MD) silently mutated in the sequence targeted by the FHF2  
652 shRNA. The mutated FHF2-VY constructs were then digested with restriction endonucleases to excise the  
653 mutated fragments, which were then subcloned into the original pDUAL2-CCM(-) plasmid. The pDUAL  
654 plasmids containing the shRNA or FHF2-VY constructs were then provided to Vector Biolabs (Malvern,  
655 PA) for the generation, purification and titration of recombinant (human type 5, dE1/E3) adenoviruses  
656 which also contain the Red (RFP) or Green (GFP) Fluorescent Proteins, respectively, as markers of  
657 infection, under the control of a CMV promoter. All plasmid and adenoviral constructs were sequenced to  
658 ensure that no unintentional mutations were introduced.

659

### 660 **Isolation, culture and adenoviral infection of neonatal mouse ventricular cardiomyocytes**

661 Single cardiomyocytes were isolated from the ventricles of C57BL/6J WT mouse neonates aged  
662 from postnatal day 0 to 3 by enzymatic and mechanical dissociation in a semi-automated procedure by  
663 using the Neonatal Heart Dissociation kit and the GentleMACS<sup>TM</sup> dissociator (Miltenyi Biotec,  
664 Gaithersburg, MD). Briefly, hearts were harvested, and the ventricles were separated from the atria and  
665 digested in the GentleMACS<sup>TM</sup> dissociator. After termination of the program, the digestion was stopped  
666 by adding medium containing Dulbecco's Modified Eagle's Medium (DMEM) supplemented with 10%  
667 horse serum, 5% fetal bovine serum and 100 U/ml penicillin and 100 µg/ml streptomycin. The cell  
668 suspension was filtered to remove undissociated tissue fragments, and centrifugated. The cell pellet was  
669 resuspended in culture medium, and the cells were plated in 60 mm-diameter Petri dishes at 37°C for 1.5

## Regulation of Na<sub>v</sub>1.5 by FHF2 phosphorylation

670 hour. The non-plated cardiomyocytes were then resuspended, plated on laminin-coated dishes at a density  
671 of 5 000 or 500 000 cells per 35 mm-diameter plate for patch-clamp and molecular biology/biochemical  
672 analyses, respectively, and incubated in 37°C, 5% CO<sub>2</sub>: 95% air incubator. After 24 hours-plating,  
673 medium was replaced by DMEM supplemented with 1% fetal bovine serum and 100 U/mL penicillin and  
674 100 µg/mL streptomycin, in the presence or absence of the shRNA- and FHF2-VY-expressing  
675 adenoviruses at a multiplicity of infection (MOI) of 50 and 1, respectively. Culture medium was then  
676 changed 24 and 48 hours after adenoviral infection with DMEM supplemented with 1% fetal bovine  
677 serum and 100 U/mL penicillin and 100 µg/mL streptomycin without adenoviruses.

678

### 679 **FHF2-lox, αMHC-Cre and FHF2-KD mice**

680 Cardiac specific FHF2-knockdown (FHF2-KD) and control FHF2-lox adult (8-16-weeks-old)  
681 male C57BL/6J mice (Angsutararux et al., Under revision for resubmission) were used. The FHF2-lox  
682 C57BL/6J mouse line, in which the FHF2 locus is floxed, was obtained from Dr. Jeanne Nerbonne, and  
683 the αMHC-Cre C57BL/6J mouse line, expressing the Cre-recombinase driven by the cardiac specific  
684 alpha Myosin Heavy Chain (αMHC) promoter, was purchased from The Jackson Laboratory (Bar Harbor,  
685 ME, Tg(Myh6-cre)2182Mds/J mouse line). To obtain cardiac specific FHF2 targeted knockdown (FHF2-  
686 KD) mice, FHF2-lox female mice were crossed with αMHC-Cre male mice. The FHF2-lox male  
687 littermates were used as controls.

688

### 689 **Isolation, culture and adenoviral infection of adult mouse ventricular cardiomyocytes**

690 Single cardiomyocytes were isolated from the ventricles of FHF2-KD and FHF2-lox adult (8-16  
691 weeks-old) male C57BL/6J mice (Angsutararux et al., Under revision for resubmission) by enzymatic  
692 dissociation and mechanical dispersion according to a modified procedure of established methods. All  
693 reagents were from Sigma-Aldrich unless otherwise noted. Briefly, mice were injected with heparin (5000

## Regulation of Na<sub>v</sub>1.5 by FHF2 phosphorylation

694 units/kg body weight) 30 minutes before sacrifice by cervical dislocation. Hearts were quickly excised,  
695 and perfused retrogradely through the aorta with a solution at 37°C containing (in mM): NaCl, 113; KCl,  
696 4.7; MgSO<sub>4</sub>, 1.2; KH<sub>2</sub>PO<sub>4</sub>, 0.6; NaH<sub>2</sub>PO<sub>4</sub>, 0.6; HEPES, 10; NaHCO<sub>3</sub>, 1.6; taurine, 30; glucose, 20 (pH 7.4  
697 with NaOH). Hearts were subsequently digested for 11 minutes with the same solution supplemented with  
698 0.08 mg/mL Liberase TM Research Grade. Following digestion, the perfusion was stopped, the atria were  
699 removed, and the ventricles were dispersed by gentle trituration. The resulting cell suspension was filtered  
700 to remove large undissociated tissue fragments, and resuspended in solutions containing 10 mg/mL  
701 bovine serum albumin and Ca<sup>2+</sup> concentrations successively increasing from nominally 0 to 0.2, 0.5 and 1  
702 mM. Isolated cardiomyocytes were then resuspended in medium-199 supplemented with 5% fetal bovine  
703 serum, 10 mM 2,3-Butanedione monoxime, 100 U/ml penicillin and 100 µg/ml streptomycin, plated on  
704 laminin-coated dishes, and incubated in 37°C, 5% CO<sub>2</sub>: 95% air incubator. After 1-hour plating, culture  
705 medium was replaced by medium-199 supplemented with 0.1% bovine serum albumin, 10 mM 2,3-  
706 Butanedione monoxime, 1X Insulin/Transferrin/Sodium Selenite, 1X Chemically Defined Lipid  
707 Concentrate (Thermo Fisher Scientific), 0.5 µM cytochalasin D, 100 U/mL penicillin and 100 µg/mL  
708 streptomycin, in the presence or absence of the different FHF2-VY-expressing adenoviruses at a  
709 multiplicity of infection (MOI) of 1.

710

### 711 **RNA preparation and SYBR Green quantitative RT-PCR**

712 Total RNA was isolated from cultured cardiomyocytes and analyzed using standard methods  
713 previously described in detail (Marionneau et al., 2008). Briefly, cells were washed twice in ice-cold PBS  
714 (pH 7.4) and lysed in buffer provided in the Nucleospin RNA kit (Machery-Nagel, Düren, Germany).  
715 Total RNA was isolated and DNase treated following the kit instructions. The quality of total RNA in  
716 each sample was examined by gel electrophoresis. Genomic DNA contamination was assessed by PCR  
717 amplification of each total RNA sample without prior cDNA synthesis; no genomic DNA was detected.

## Regulation of Na<sub>v</sub>1.5 by FHF2 phosphorylation

718 First strand cDNA was synthesized from 200 ng of total RNA from each sample using the High-  
719 Capacity cDNA Archive kit (Thermo Fisher Scientific). The relative expression levels of transcripts  
720 encoding the different FHF isoforms, including FHF1, FHF2-VY, FHF2-V, FHF2-Y, FHF2-A, FHF2-B,  
721 FHF3 and FHF4, as well as the hypoxanthine guanine phosphoribosyl transferase I (HPRT) used as an  
722 endogenous control, were determined by quantitative RT-PCR using 1X SYBR Green PCR Master Mix  
723 (Thermo Fisher Scientific). PCR reactions were performed on 10 ng of cDNA in the ABI PRISM 7900HT  
724 Sequence Detection System (Thermo Fisher Scientific) using isoform specific primer pairs giving 90-  
725 100% efficacy and a single amplicon at the appropriate melting temperature and size (**Table Supplement**  
726 **2**). The cycling conditions included a hot start at 95°C for 10 min, followed by 40 cycles at 95°C for 15 s  
727 and 60°C for 1 min. Results for each sample were normalized to HPRT, and expressed according to the 2<sup>-</sup>  
728 <sup>ΔCt</sup> method, as relative transcript expression compared with HPRT.

729

### 730 **Preparation of cardiomyocyte lysates and western blot analyses**

731 Cultured cardiomyocytes were lysed and western blot analyses of cardiomyocyte lysates were  
732 completed as described previously (Lorenzini et al., 2021). Briefly, cells were washed twice in ice-cold  
733 PBS (pH 7.4) and lysed in ice-cold lysis buffer containing 20 mM HEPES (pH 7.4), 150 mM NaCl, 0.5%  
734 amidosulfo betaine, 1X complete protease inhibitor cocktail tablet, 1 mM phenylmethylsulfonyl fluoride  
735 (PMSF), 0.7 μg/ml pepstatin A (Thermo Fisher Scientific) and 1X Halt phosphatase inhibitor cocktail  
736 (Thermo Fisher Scientific). All reagents were from Sigma-Aldrich unless otherwise noted. After 15-  
737 minutes rotation at 4°C, protein concentrations in detergent-soluble cell lysates were determined using the  
738 Pierce BCA Protein Assay kit (Thermo Fisher Scientific), and proteins were subsequently analyzed by  
739 western blot. The mouse FHF2 isoforms (all included), the human FHF2-VY isoform and the mouse  
740 FHF2-A isoform were specifically detected using an anti-FHF2 rabbit polyclonal antibody (1:1000) given  
741 by Dr. Cecilia Lindskog Bergström (Human Protein Atlas project, Uppsala University, Sweden), the anti-  
742 FGF13 mouse monoclonal antibody (Antibodies Incorporated, Davis, CA, NeuroMab clone N91/27,

## Regulation of Na<sub>v</sub>1.5 by FHF2 phosphorylation

743 1:300), and the anti-Pan-FHF-A mouse monoclonal antibody (Antibodies Incorporated, NeuroMab clone  
744 N235/22, 1:300), respectively. The anti-transferrin receptor mouse monoclonal antibody (TransR, clone  
745 H68.4, Thermo Fisher Scientific, 1:1000) and the anti-alpha 1 Na<sup>+</sup>/K<sup>+</sup>-ATPase mouse monoclonal  
746 antibody (Na<sup>+</sup>/K<sup>+</sup>-ATPase  $\alpha$ 1, #ab7671, Abcam, Cambridge, United Kingdom, 1:1000) were used to  
747 verify equal protein loading. Bound primary antibodies were detected using horseradish peroxidase-  
748 conjugated goat anti-mouse or -rabbit secondary antibodies (Cell Signaling Technology, Inc., Danvers,  
749 MA), and protein signals were visualized using the SuperSignal West Dura Extended Duration Substrate  
750 (Thermo Fisher Scientific). Bands corresponding to FHF2 were normalized to bands corresponding to  
751 TransR from the same sample, and relative FHF2 protein expression is expressed relative to TransR  
752 protein expression.

753

### 754 **Electrophysiological recordings**

755 Whole-cell Na<sub>v</sub> currents were recorded at room temperature from neonatal and adult mouse  
756 ventricular cardiomyocytes using an Axopatch 200B amplifier (Axon Instruments, Molecular Devices,  
757 San Jose, CA) 48 hours following adenoviral infection. Voltage-clamp protocols were applied using the  
758 pClamp 10.4 software package (Axon Instruments) interfaced to the electrophysiological equipment using  
759 a Digidata 1440A digitizer (Axon Instruments). Current signals were filtered at 10 kHz prior to  
760 digitization at 50 kHz and storage. Patch-clamp pipettes were fabricated from borosilicate glass (OD: 1.5  
761 mm, ID: 0.86 mm, Sutter Instrument, Novato, CA) using a P-97 micropipette puller (Sutter Instrument) to  
762 obtain a resistance between 0.8 and 1.5 M $\Omega$  when filled with internal solution. For both neonatal and  
763 adult cardiomyocytes, the internal solution contained (in mM): NaCl 5, CsF 115, CsCl 20, HEPES 10,  
764 EGTA 10 (pH 7.35 with CsOH, ~300 mosM). The external solution used to patch neonatal  
765 cardiomyocytes contained (in mM): NaCl 20, CsCl 103, TEA-Cl (tetraethylammonium chloride) 25,  
766 HEPES 10, Glucose 5, CaCl<sub>2</sub> 1, MgCl<sub>2</sub> 2, CoCl<sub>2</sub> 2.5 (pH 7.4 with CsOH, ~300 mosM); and the external  
767 solution used to patch adult cardiomyocytes contained (in mM): NaCl 10, CsCl 5, N-Methyl-D-

## Regulation of Na<sub>v</sub>1.5 by FHF2 phosphorylation

768 Glucamine (NMDG) 104, TEA-Cl 25, HEPES 10, Glucose 5, CaCl<sub>2</sub> 1, MgCl<sub>2</sub> 2, CoCl<sub>2</sub> 2.5 (pH 7.4 with  
769 CsOH, ~300 mosM). All chemicals were purchased from Sigma-Aldrich. After establishing the whole-  
770 cell configuration, five minutes were allowed to ensure stabilization of voltage-dependence of activation  
771 and inactivation properties, at which time 25 ms voltage steps to  $\pm 10$  mV from a holding potential (HP)  
772 of -70 mV were applied to allow measurement of whole-cell membrane capacitances, input and series  
773 resistances. Only cells with access resistance  $< 7$  M $\Omega$  were used, and input resistances were typically  $> 1$   
774 G $\Omega$ . After compensation of series resistance (80%), the membrane was held at a HP of -120 mV, and the  
775 voltage-clamp protocols were carried out as indicated below. Leak currents were always  $< 300$  pA at HP  
776 (-120 mV), and were corrected offline. Cells exhibiting peak current amplitudes  $< 500$  or  $> 5000$  pA were  
777 excluded from analyses of biophysical properties because of errors associated with leak or voltage-clamp  
778 (Montnach et al., 2021), respectively, but were conserved in analyses of peak current density to avoid bias  
779 in evaluation of current densities.

780 Data were compiled and analyzed using ClampFit 11.2 (Axon Instruments), Microsoft Excel, and  
781 Prism (GraphPad Software, San Diego, CA). Whole-cell membrane capacitances (C<sub>m</sub>) were determined  
782 by analyzing the decays of capacitive transients elicited by brief (25 ms) voltage steps to  $\pm 10$  mV from  
783 the HP (-70 mV). Input resistances were calculated from the steady-state currents elicited by the same  
784  $\pm 10$  mV steps (from the HP). Series resistances were calculated by dividing the decay time constants of  
785 the capacitive transients (fitted with single exponentials) by the C<sub>m</sub>. To determine peak Na<sup>+</sup> current-  
786 voltage relationships, currents were elicited by 50-ms depolarizing pulses to potentials ranging from -80  
787 to +40 mV (presented at 5-s intervals in 5-mV increments) from a HP of -120 mV. Peak current  
788 amplitudes were defined as the maximal currents evoked at each voltage. Current amplitudes were leak-  
789 corrected, normalized to the C<sub>m</sub>, and current densities are presented.

790 To analyze voltage-dependence of current activation properties, conductances (G) were  
791 calculated, and conductance-voltage relationships were fitted with the Boltzmann equation  $G = G_{\max} / (1 +$   
792  $\exp(-(V_m - V_{1/2}) / k))$ , in which  $V_{1/2}$  is the membrane potential of half-activation and k is the slope factor.  
793 The time courses of inactivation of macroscopic currents were determined by fitting the current decay



## Regulation of Na<sub>v</sub>1.5 by FHF2 phosphorylation

794 with the bi-exponential function  $I(t) = A_{\text{fast}} \times \exp(-t/\tau_{\text{fast}}) + A_{\text{slow}} \times \exp(-t/\tau_{\text{slow}}) + A_0$ , in which  $A_{\text{fast}}$  and  
795  $A_{\text{slow}}$  are the amplitudes of the fast and slow inactivating current components, respectively, and  $\tau_{\text{fast}}$  and  
796  $\tau_{\text{slow}}$  are the decay time constants of  $A_{\text{fast}}$  and  $A_{\text{slow}}$ , respectively. In order to visually inspect changes in  
797 current decay kinetics, overlays of  $I_{\text{Na}}$  recordings were obtained after normalization by the peak current  
798 amplitude; and representative current traces are presented. A standard two-pulse protocol was used to  
799 examine the voltage-dependences of steady-state inactivation. From a HP of -120 mV, 1-s conditioning  
800 pulses to potentials ranging from -120 to -35 mV (in 5-mV increments) were followed by 20-ms test  
801 depolarizations to -20 mV (interpulse intervals were 5-s). Current amplitudes evoked from each  
802 conditioning voltage were measured and normalized to the maximal current ( $I_{\text{max}}$ ) evoked from -120 mV,  
803 and normalized currents were plotted as a function of the conditioning voltage. The resulting steady-state  
804 inactivation curves were fitted with the Boltzmann equation  $I = I_{\text{max}} / (1 + \exp((V_m - V_{1/2}) / k))$ , in which  
805  $V_{1/2}$  is the membrane potential of half-inactivation and  $k$  is the slope factor. To examine the rates of  
806 recovery from inactivation, a three-pulse protocol was used. Cells were first depolarized to -20 mV (from  
807 a HP of -120 mV) to inactivate the channels, and subsequently repolarized to -120 mV for varying times  
808 (ranging from 1 to 200 ms), followed by test depolarizations to -20 mV to assess the extent of recovery  
809 (interpulse intervals were 5-s). The current amplitudes at -20 mV, measured following each recovery  
810 period, were normalized to the maximal current amplitude and plotted as function of the recovery time.  
811 The resulting plot was fitted with a double exponential function  $I(t) = A \times (1 - \exp(-t / \tau_{\text{fast}}) + 1 - \exp(-t /$   
812  $\tau_{\text{slow}})) + C$  to determine the time constants for fast ( $\tau_{\text{fast}}$ ) and slow ( $\tau_{\text{slow}}$ ) recovery from inactivation. For  
813 each of these biophysical properties, data from individual cells were first fitted and then averaged.

814 In experiments aimed at recording the tetrodotoxin (TTX)-sensitive late Na<sup>+</sup> current ( $I_{\text{NaL}}$ ),  
815 cardiomyocytes were bathed in external solution containing (in mM): NaCl 120, TEA-Cl 25, HEPES 10,  
816 Glucose 5, CaCl<sub>2</sub> 1, MgCl<sub>2</sub> 2, CoCl<sub>2</sub> 2.5 (pH 7.4 with CsOH, ~300 mosM). Repetitive 350-ms test pulses  
817 to -20 mV from a HP of -120 mV (at 5-s intervals) were applied to cells to record Na<sup>+</sup> currents in the  
818 absence of TTX. Cells were then superfused locally with the external solution supplemented with 60 μM



## Regulation of Na<sub>v</sub>1.5 by FHF2 phosphorylation

819 TTX (Bio-Techne SAS, Rennes, France). Cells exhibiting differences in leak current amplitudes before  
820 and after TTX application > 5 pA at -20 mV (calculated from leak currents at -120 mV) were excluded  
821 from analyses. TTX-sensitive currents from individual cells were determined by offline digital subtraction  
822 of average leak-subtracted currents obtained from 5 recordings in the absence and in the presence of TTX  
823 after achieving steady state. The amplitude of TTX-sensitive I<sub>NaL</sub> was defined as the mean steady-state  
824 current amplitude of macroscopic TTX-sensitive current measured from 150 to 350 ms. For each cell, the  
825 TTX-sensitive I<sub>NaL</sub> amplitude was normalized to the C<sub>m</sub>, and I<sub>NaL</sub> current densities are presented.

826

### 827 **Statistical analyses**

828 Results are expressed as means ± SEM. Data were first tested for normality using the D'Agostino  
829 and Pearson normality test. Depending on the results of normality tests, statistical analyses were then  
830 performed using the Mann-Whitney nonparametric test or the ordinary one-way ANOVA followed by the  
831 Tukey's multiple comparisons post-hoc test, as indicated in Figures and Tables. All these analyses, as  
832 well as plots and graphs were performed using Prism (GraphPad Software).

833

834

835

836

837

838

839

840

841

842

843

844

## Regulation of Na<sub>v</sub>1.5 by FHF2 phosphorylation

845

846 **Acknowledgements:** This work was supported by the *Agence Nationale de la Recherche* [ANR-15-  
847 CE14-0006-01 and ANR-16-CE92-0013-01 to CM] and the National Institutes of Health [R01-HL148803  
848 to JRS and CM; R01-HL034161 and R01-HL142520 to JMN]. The proteomic experiments were  
849 performed at the Washington University Proteomics Shared Resource (WU-PSR), R. Reid Townsend  
850 MD, PhD., Director, Robert W. Sprung and Qiang Zhang, PhD., Co-Directors. The WU-PSR is supported  
851 in part by the WU Institute of Clinical and Translational Sciences (NCATS UL1 TR000448), the Mass  
852 Spectrometry Research Resource (NIGMS P41 GM103422) and the Siteman Comprehensive Cancer  
853 Center Support Grant (NCI P30 CA091842). ML was supported by a *Groupe de Réflexion sur la*  
854 *Recherche Cardiovasculaire-Société Française de Cardiologie* predoctoral fellowship [SFC/GRRC2018].  
855 SB was supported by a Lefoulon-Delalande postdoctoral fellowship. The expert technical assistance of  
856 Agnès Tessier, Bérangère Evrard, Petra Erdmann-Gilmore, Dr. Yiling Mi, Alan Davis and Rose Connors  
857 is gratefully acknowledged. The content of the research reported is solely the responsibility of the authors  
858 and does not necessarily represent the official view of the funding agencies.

859

860 **Competing Interests:** The authors declare no competing financial interests.

861

862 **Author Contributions:** CM designed the study and wrote the paper. DM, RRT, JMN and CM designed,  
863 performed and/or analyzed the mass spectrometry experiments. AL, ML, SB, MS, FB, JRS, JMN and CM  
864 designed, performed and/or analyzed the functional analyses. JMN provided the FHF2-lox C57BL/6J  
865 mouse line. All authors reviewed the results and approved the final version of the manuscript.

866

867

868

869

Regulation of Na<sub>v</sub>1.5 by FHF2 phosphorylation

870

871 **References**

- 872 Abrams, J., D. Roybal, N. Chakouri, A.N. Katchman, R. Weinberg, L. Yang, B.X. Chen, S.I. Zakharov,  
873 J.A. Hennessey, U.M.R. Avula, J. Diaz, C. Wang, E.Y. Wan, G.S. Pitt, M. Ben-Johny, and S.O.  
874 Marx. 2020. Fibroblast growth factor homologous factors tune arrhythmogenic late NaV1.5  
875 current in calmodulin binding-deficient channels. *JCI Insight*. 5.
- 876 Angsutararux, P., A. Dutta, M. Marras, C. Abella, R.L. Mellor, J. Shi, J.M. Nerbonne, and J.R. Silva.  
877 Under revision for resubmission. Mechanisms of intracellular fibroblast growth factor (iFGF)  
878 regulation of human cardiac sodium channel gating. *J Gen Physiol*.
- 879 Burel, S., F.C. Coyan, M. Lorenzini, M.R. Meyer, C.F. Lichti, J.H. Brown, G. Loussouarn, F.  
880 Charpentier, J.M. Nerbonne, R.R. Townsend, L.S. Maier, and C. Marionneau. 2017. C-terminal  
881 phosphorylation of NaV1.5 impairs FGF13-dependent regulation of channel inactivation. *J Biol*  
882 *Chem*. 292:17431-17448.
- 883 Chakouri, N., S. Rivas, D. Roybal, L. Yang, J. Diaz, A. Hsu, R. Mahling, B.X. Chen, J.O. Owoyemi, D.  
884 DiSilvestre, D. Sirabella, B. Corneo, G.F. Tomaselli, I.E. Dick, S.O. Marx, and M. Ben-Johny.  
885 2022. Fibroblast growth factor homologous factors serve as a molecular rheostat in tuning  
886 arrhythmogenic cardiac late sodium current. *Nat Cardiovasc Res*. 1:1-13.
- 887 Chen-Izu, Y., R.M. Shaw, G.S. Pitt, V. Yarov-Yarovoy, J.T. Sack, H. Abriel, R.W. Aldrich, L.  
888 Belardinelli, M.B. Cannell, W.A. Catterall, W.J. Chazin, N. Chiamvimonvat, I. Deschenes, E.  
889 Grandi, T.J. Hund, L.T. Izu, L.S. Maier, V.A. Maltsev, C. Marionneau, P.J. Mohler, S. Rajamani,  
890 R.L. Rasmusson, E.A. Sobie, C.E. Clancy, and D.M. Bers. 2015. Na<sup>+</sup> channel function,  
891 regulation, structure, trafficking and sequestration. *J Physiol*. 593:1347-1360.
- 892 Chen, Z.W., K. Fuchs, W. Sieghart, R.R. Townsend, and A.S. Evers. 2012. Deep amino acid sequencing  
893 of native brain GABAA receptors using high-resolution mass spectrometry. *Mol Cell Proteomics*.  
894 11:M111 011445.

Regulation of Nav1.5 by FHF2 phosphorylation

- 895 Effraim, P.R., J. Huang, A. Lampert, S. Stamboulian, P. Zhao, J.A. Black, S.D. Dib-Hajj, and S.G.  
896 Waxman. 2019. Fibroblast growth factor homologous factor 2 (FGF-13) associates with Nav1.7  
897 in DRG neurons and alters its current properties in an isoform-dependent manner. *Neurobiol*  
898 *Pain*. 6:100029.
- 899 Erde, J., R.R. Loo, and J.A. Loo. 2014. Enhanced FASP (eFASP) to increase proteome coverage and  
900 sample recovery for quantitative proteomic experiments. *J Proteome Res*. 13:1885-1895.
- 901 Gade, A.R., S.O. Marx, and G.S. Pitt. 2020. An interaction between the III-IV linker and CTD in Nav1.5  
902 confers regulation of inactivation by CaM and FHF. *J Gen Physiol*. 152.
- 903 Goetz, R., K. Dover, F. Laezza, N. Shtraizent, X. Huang, D. Tchetchik, A.V. Eliseenkova, C.F. Xu, T.A.  
904 Neubert, D.M. Ornitz, M. Goldfarb, and M. Mohammadi. 2009. Crystal structure of a fibroblast  
905 growth factor homologous factor (FHF) defines a conserved surface on FHF2 for binding and  
906 modulation of voltage-gated sodium channels. *J Biol Chem*. 284:17883-17896.
- 907 Hennessey, J.A., C.A. Marcou, C. Wang, E.Q. Wei, D.J. Tester, M. Torchio, F. Dagradi, L. Crotti, P.J.  
908 Schwartz, M.J. Ackerman, and G.S. Pitt. 2013. FGF12 is a candidate Brugada syndrome locus.  
909 *Heart Rhythm*. 10:1886-1894.
- 910 Hsu, W.C., F. Scala, M.N. Nenov, N.C. Wildburger, H. Elferink, A.K. Singh, C.B. Chesson, T.  
911 Buzhdygan, M. Sohail, A.S. Shavkunov, N.I. Panova, C.L. Nilsson, J.S. Rudra, C.F. Lichti, and  
912 F. Laezza. 2016. CK2 activity is required for the interaction of FGF14 with voltage-gated sodium  
913 channels and neuronal excitability. *FASEB J*. 30:2171-2186.
- 914 Hsu, W.J., N.C. Wildburger, S.J. Haidacher, M.N. Nenov, O. Folorunso, A.K. Singh, B.C. Chesson, W.F.  
915 Franklin, I. Cortez, R.G. Sadygov, K.T. Dineley, J.S. Rudra, G. Tagliatela, C.F. Lichti, L.  
916 Denner, and F. Laezza. 2017. PPARgamma agonists rescue increased phosphorylation of FGF14  
917 at S226 in the Tg2576 mouse model of Alzheimer's disease. *Exp Neurol*. 295:1-17.
- 918 James, T.F., M.N. Nenov, N.C. Wildburger, C.F. Lichti, J. Luisi, F. Vergara, N.I. Panova-Electronova,  
919 C.L. Nilsson, J.S. Rudra, T.A. Green, D. Labate, and F. Laezza. 2015. The Nav1.2 channel is  
920 regulated by GSK3. *Biochim Biophys Acta*. 1850:832-844.

Regulation of Nav1.5 by FHF2 phosphorylation

- 921 Li, Q., Y. Zhao, G. Wu, S. Chen, Y. Zhou, S. Li, M. Zhou, Q. Fan, J. Pu, K. Hong, X. Cheng, Q. Kenneth  
922 Wang, and X. Tu. 2017. De Novo FGF12 (Fibroblast Growth Factor 12) Functional Variation Is  
923 Potentially Associated With Idiopathic Ventricular Tachycardia. *J Am Heart Assoc.* 6.
- 924 Liu, C.J., S.D. Dib-Hajj, M. Renganathan, T.R. Cummins, and S.G. Waxman. 2003. Modulation of the  
925 cardiac sodium channel Nav1.5 by fibroblast growth factor homologous factor 1B. *J Biol Chem.*  
926 278:1029-1036.
- 927 Lorenzini, M., S. Burel, A. Lesage, E. Wagner, C. Charriere, P.M. Chevillard, B. Evrard, D. Maloney,  
928 K.M. Ruff, R.V. Pappu, S. Wagner, J.M. Nerbonne, J.R. Silva, R.R. Townsend, L.S. Maier, and  
929 C. Marionneau. 2021. Proteomic and functional mapping of cardiac Nav1.5 channel  
930 phosphorylation sites. *J Gen Physiol.* 153.
- 931 Marionneau, C., and H. Abriel. 2015. Regulation of the cardiac Na channel Na1.5 by post-translational  
932 modifications. *J Mol Cell Cardiol.* 82:36-47.
- 933 Marionneau, C., S. Brunet, T.P. Flagg, T.K. Pilgram, S. Demolombe, and J.M. Nerbonne. 2008. Distinct  
934 cellular and molecular mechanisms underlie functional remodeling of repolarizing K<sup>+</sup> currents  
935 with left ventricular hypertrophy. *Circ Res.* 102:1406-1415.
- 936 Marionneau, C., C.F. Lichti, P. Lindenbaum, F. Charpentier, J.M. Nerbonne, R.R. Townsend, and J.  
937 Merot. 2012. Mass Spectrometry-Based Identification of Native Cardiac Nav1.5 Channel alpha  
938 Subunit Phosphorylation Sites. *J Proteome Res.* 11:5994-6007.
- 939 Montnach, J., M. Lorenzini, A. Lesage, I. Simon, S. Nicolas, E. Moreau, C. Marionneau, I. Baro, M. De  
940 Waard, and G. Loussouarn. 2021. Computer modeling of whole-cell voltage-clamp analyses to  
941 delineate guidelines for good practice of manual and automated patch-clamp. *Sci Rep.* 11:3282.
- 942 Munoz-Sanjuan, I., P.M. Smallwood, and J. Nathans. 2000. Isoform diversity among fibroblast growth  
943 factor homologous factors is generated by alternative promoter usage and differential splicing. *J*  
944 *Biol Chem.* 275:2589-2597.
- 945 Musa, H., C.F. Kline, A.C. Sturm, N. Murphy, S. Adelman, C. Wang, H. Yan, B.L. Johnson, T.A. Csepe,  
946 A. Kilic, R.S. Higgins, P.M. Janssen, V.V. Fedorov, R. Weiss, C. Salazar, T.J. Hund, G.S. Pitt,

## Regulation of Nav1.5 by FHF2 phosphorylation

- 947 and P.J. Mohler. 2015. SCN5A variant that blocks fibroblast growth factor homologous factor  
948 regulation causes human arrhythmia. *Proc Natl Acad Sci U S A*. 112:12528-12533.
- 949 Onkal, R., J.H. Mattis, S.P. Fraser, J.K. Diss, D. Shao, K. Okuse, and M.B. Djamgoz. 2008. Alternative  
950 splicing of Nav1.5: an electrophysiological comparison of 'neonatal' and 'adult' isoforms and  
951 critical involvement of a lysine residue. *J Cell Physiol*. 216:716-726.
- 952 Park, D.S., A. Shekhar, C. Marra, X. Lin, C. Vasquez, S. Solinas, K. Kelley, G. Morley, M. Goldfarb, and  
953 G.I. Fishman. 2016. Fhf2 gene deletion causes temperature-sensitive cardiac conduction failure.  
954 *Nat Commun*. 7:12966.
- 955 Rush, A.M., E.K. Wittmack, L. Tyrrell, J.A. Black, S.D. Dib-Hajj, and S.G. Waxman. 2006. Differential  
956 modulation of sodium channel Na(v)1.6 by two members of the fibroblast growth factor  
957 homologous factor 2 subfamily. *Eur J Neurosci*. 23:2551-2562.
- 958 Santucci, J., 3rd, D.S. Park, A. Shekhar, X. Lin, L. Bu, N. Yamaguchi, S. Mintz, E.W. Chang, A.  
959 Khodadadi-Jamayran, G. Redel-Traub, M. Goldfarb, and G.I. Fishman. 2022. Contrasting Ionic  
960 Mechanisms of Impaired Conduction in FHF1- and FHF2-Deficient Hearts. *Circ Arrhythm  
961 Electrophysiol*. 15:e011296.
- 962 Schneider, C., R.A. Newman, D.R. Sutherland, U. Asser, and M.F. Greaves. 1982. A one-step  
963 purification of membrane proteins using a high efficiency immunomatrix. *J Biol Chem*.  
964 257:10766-10769.
- 965 Shavkunov, A.S., N.C. Wildburger, M.N. Nenov, T.F. James, T.P. Buzhdygan, N.I. Panova-Elektronova,  
966 T.A. Green, R.L. Veselenak, N. Bourne, and F. Laezza. 2013. The fibroblast growth factor  
967 14.voltage-gated sodium channel complex is a new target of glycogen synthase kinase 3 (GSK3).  
968 *J Biol Chem*. 288:19370-19385.
- 969 Vassilev, P.M., T. Scheuer, and W.A. Catterall. 1988. Identification of an intracellular peptide segment  
970 involved in sodium channel inactivation. *Science*. 241:1658-1661.

Regulation of Nav1.5 by FHF2 phosphorylation

- 971 Wadsworth, P.A., A.K. Singh, N. Nguyen, N.M. Dvorak, C.M. Tapia, W.K. Russell, C. Stephan, and F.  
972 Laezza. 2020. JAK2 regulates Nav1.6 channel function via FGF14(Y158) phosphorylation.  
973 *Biochim Biophys Acta Mol Cell Res.* 1867:118786.
- 974 Wang, C., B.C. Chung, H. Yan, S.Y. Lee, and G.S. Pitt. 2012. Crystal structure of the ternary complex of  
975 a Nav C-terminal domain, a fibroblast growth factor homologous factor, and calmodulin.  
976 *Structure.* 20:1167-1176.
- 977 Wang, C., J.A. Hennessey, R.D. Kirkton, V. Graham, R.S. Puranam, P.B. Rosenberg, N. Bursac, and G.S.  
978 Pitt. 2011a. Fibroblast growth factor homologous factor 13 regulates Na<sup>+</sup> channels and  
979 conduction velocity in murine hearts. *Circ Res.* 109:775-782.
- 980 Wang, C., E.G. Hoch, and G.S. Pitt. 2011b. Identification of novel interaction sites that determine  
981 specificity between fibroblast growth factor homologous factors and voltage-gated sodium  
982 channels. *J Biol Chem.* 286:24253-24263.
- 983 Wang, X., H. Tang, E.Q. Wei, Z. Wang, J. Yang, R. Yang, S. Wang, Y. Zhang, G.S. Pitt, H. Zhang, and  
984 C. Wang. 2017. Conditional knockout of Fgf13 in murine hearts increases arrhythmia  
985 susceptibility and reveals novel ion channel modulatory roles. *J Mol Cell Cardiol.* 104:63-74.
- 986 Wildburger, N.C., S.R. Ali, W.C. Hsu, A.S. Shavkunov, M.N. Nenov, C.F. Lichti, R.D. LeDuc, E.  
987 Mostovenko, N.I. Panova-Elektronova, M.R. Emmett, C.L. Nilsson, and F. Laezza. 2015.  
988 Quantitative proteomics reveals protein-protein interactions with fibroblast growth factor 12 as a  
989 component of the voltage-gated sodium channel 1.2 (nav1.2) macromolecular complex in  
990 Mammalian brain. *Mol Cell Proteomics.* 14:1288-1300.
- 991 Wisniewski, J.R., A. Zougman, N. Nagaraj, and M. Mann. 2009. Universal sample preparation method  
992 for proteome analysis. *Nat Methods.* 6:359-362.
- 993 Yang, J., Z. Wang, D.S. Sinden, X. Wang, B. Shan, X. Yu, H. Zhang, G.S. Pitt, and C. Wang. 2016.  
994 FGF13 modulates the gating properties of the cardiac sodium channel Nav1.5 in an isoform-  
995 specific manner. *Channels (Austin).* 10:410-420.

## Regulation of Na<sub>v</sub>1.5 by FHF2 phosphorylation

996 Zhang, J., L. Xin, B. Shan, W. Chen, M. Xie, D. Yuen, W. Zhang, Z. Zhang, G.A. Lajoie, and B. Ma.  
997 2012. PEAKS DB: de novo sequencing assisted database search for sensitive and accurate peptide  
998 identification. *Mol Cell Proteomics*. 11:M111 010587.

999

### 1000 **Figure Legends**

1001 **Figure 1.** Mass spectrometric identification and stoichiometry of nine FHF2 phosphorylation sites from  
1002 mouse left ventricular Na<sub>v</sub> channel complexes. (A) The mouse FHF2-VY, FHF2-V, FHF2-Y, FHF2-A,  
1003 FHF2-B and FHF4-B, and human FHF1-A and FHF1-B sequences are aligned, and the phosphorylation  
1004 sites identified by MS on mouse FHF2-VY and conserved in the other FHF isoforms are highlighted in  
1005 red. MS-covered sequence is highlighted in yellow; and FGF homology core domain is underlined in  
1006 black. Amino acid sequences, masses and MS quality indicators of detected FHF peptides are provided in  
1007 **Table 1 and Table Supplement 1.** The four phosphorylation clusters analyzed electrophysiologically are  
1008 boxed in black. (B) The areas of extracted MS1 ion chromatograms, corresponding to MS2 spectra  
1009 assigning phosphorylated (in red) and non-phosphorylated (in white) FHF2 peptides at indicated site(s),  
1010 in mαNa<sub>v</sub>PAN-IPs from adult mouse left ventricles are indicated. Phosphosite stoichiometry is analyzed  
1011 individually (S218) or by clusters of two (S35-38, S230-232, S238-240 and S250-255) as corresponding  
1012 phosphosites are identified from the same phosphopeptides.

1013

1014 **Figure 2.** FHF2 expression in WT, knockdown and rescued neonatal and adult mouse ventricular  
1015 cardiomyocytes. Neonatal ventricular cardiomyocytes were freshly isolated from WT mouse pups. Adult  
1016 ventricular cardiomyocytes were freshly isolated from FHF2-lox or cardiac specific FHF2-knockdown  
1017 (FHF2-KD) mice. The knockdown of FHF2 in neonatal cardiomyocytes was obtained using FHF2  
1018 shRNA-expressing adenoviruses, and the expression of FHF2 in both neonatal and adult cardiomyocytes  
1019 was rescued using adenoviruses expressing WT (FHF2-VY-WT), phosphosilent (mutation to alanine) or  
1020 phosphomimetic (mutation to glutamate) FHF2-VY at indicated sites. (A) Mean ± SEM relative



## Regulation of Na<sub>v</sub>1.5 by FHF2 phosphorylation

1021 transcript expression of FHF1 (n=12 in each group), FHF2-VY (n=28 in control and 24 in FHF2 shRNA  
1022 samples), FHF2-V (n=12 in each group), FHF2-Y (n=4 in each group), FHF2-A (n=12 in each group) and  
1023 FHF4 (n=12 in each group) isoforms in neonatal mouse ventricular cardiomyocytes infected with control  
1024 or FHF2 shRNA-expressing adenoviruses. **(B)** Mean  $\pm$  SEM relative transcript expression of FHF2-VY  
1025 in neonatal mouse ventricular cardiomyocytes infected with adenoviruses expressing control shRNA  
1026 (n=28), FHF2 shRNA alone (n=24) or with FHF2-VY-WT (n=16), FHF2-VY-35-38A (n=6), FHF2-VY-  
1027 35-38E (n=4), FHF2-VY-218A (n=4), FHF2-VY-218E (n=4), FHF2-VY-230-232A (n=4), FHF2-VY-  
1028 230-232E (n=4), FHF2-VY-238-240A (n=4), FHF2-VY-238-240E (n=4), FHF2-VY-250-255A (n=4),  
1029 FHF2-VY-250-255E (n=4) or FHF2-VY-9A (n=2). Representative western blot **(C)** and mean  $\pm$  SEM  
1030 relative protein expression **(D)** of FHF2 (all isoforms) in neonatal mouse ventricular cardiomyocytes  
1031 infected with adenoviruses expressing control (n=6) or FHF2 (n=6) shRNA. **(E)** Representative western  
1032 blot of the rescued human FHF2-VY isoform in neonatal mouse ventricular cardiomyocytes infected with  
1033 adenoviruses expressing FHF2 shRNA alone (n=4) or with FHF2-VY-WT (n=4) or FHF2-VY-9A (n=4).  
1034 **(F)** Representative western blot of FHF2 (all isoforms) in ventricular cardiomyocytes isolated from  
1035 FHF2-lox (n=3) and FHF2-KD (n=3) adult mice. **(G)** Representative western blots of the rescued human  
1036 FHF2-VY isoform in neonatal mouse ventricular cardiomyocytes infected with adenoviruses expressing  
1037 FHF2 shRNA and FHF2-VY-WT (n=14), FHF2-VY-35-38A (n=10), FHF2-VY-35-38E (n=8), FHF2-  
1038 VY-218A (n=6), FHF2-VY-218E (n=4), FHF2-VY-230-232A (n=2), FHF2-VY-230-232E (n=4), FHF2-  
1039 VY-238-240A (n=4), FHF2-VY-238-240E (n=4), FHF2-VY-250-255A (n=4) or FHF2-VY-250-255E  
1040 (n=4). **(H)** Mean  $\pm$  SEM relative transcript expression of FHF2-VY, FHF2-V, FHF2-Y and FHF2-A  
1041 isoforms in neonatal and adult ventricular cardiomyocytes isolated from WT mice (n=6 in each group).  
1042 **(I)** Representative western blot of FHF2-A in ventricular cardiomyocytes isolated from WT (n=6) and  
1043 FHF2-KD (n=2) adult mice, and WT neonatal mouse ventricular cardiomyocytes infected (n=2) or not  
1044 (n=8) with FHF2 shRNA-expressing adenoviruses. Note that the FHF2-A band is absent in neonatal  
1045 cardiomyocytes knockdown for FHF2, validating the specificity of the detection. All western blots were

## Regulation of Na<sub>v</sub>1.5 by FHF2 phosphorylation

1046 probed in parallel with the anti-transferrin receptor (TransR) or the anti-Na<sup>+</sup>/K<sup>+</sup>-ATPase  $\alpha$ 1 antibodies to  
1047 verify equal protein loading. \*\* $p < 0.01$ , \*\*\*\* $p < 0.0001$  versus control shRNA (**A** and **D**) or neonatal WT  
1048 mouse ventricular cardiomyocytes (**H**), Mann Whitney test.

1049

1050 **Figure 3.** The increased closed-state and open-state inactivation rates of Na<sub>v</sub> channels induced by FHF2  
1051 knockdown are partially rescued by the FHF2-VY isoform while no rescue of the shift in voltage-  
1052 dependence of activation towards hyperpolarized potentials is obtained in neonatal mouse ventricular  
1053 cardiomyocytes. (**A**) Representative whole-cell voltage-gated Na<sup>+</sup> currents recorded 48 hours following  
1054 infection of neonatal WT mouse ventricular cardiomyocytes with adenoviruses expressing control  
1055 shRNA, FHF2 shRNA alone or with WT FHF2-VY (FHF2-VY-WT) using the protocols illustrated in  
1056 each panel. Scale bars are 1 nA and 3 ms. Voltage-dependences of steady-state current inactivation (**B**)  
1057 and activation (**C**). (**D**) Mean  $\pm$  SEM peak Na<sup>+</sup> current ( $I_{Na}$ ) densities plotted as a function of test  
1058 potential. (**E**) Superimposed representative current traces recorded at 0 mV (HP = -120 mV) from  
1059 cardiomyocytes infected with adenoviruses expressing control shRNA (black), FHF2 shRNA alone  
1060 (green) or with FHF2-VY-WT (red). Mean  $\pm$  SEM time constants of fast ( $\tau_{fast}$ , **F**) and slow ( $\tau_{slow}$ , **G**)  
1061 inactivation, and proportions of fast to slow inactivation components ( $A_{fast}/A_{slow}$ , **H**) plotted as a function  
1062 of test potential. Current densities, time- and voltage-dependent properties, as well as statistical  
1063 comparisons across groups are provided in **Figure 4 & Table 2**.

1064

1065 **Figure 4.** Distributions and mean  $\pm$  SEM membrane potentials for half-activation (**A**) and half-  
1066 inactivation (**B**), peak Na<sup>+</sup> current ( $I_{Na}$ ) densities (**C**), time constants of fast ( $\tau_{fast}$ , **D**) and slow ( $\tau_{slow}$ , **E**)  
1067 inactivation, and proportions of fast to slow inactivation components ( $A_{fast}/A_{slow}$ , **F**) from neonatal WT  
1068 mouse ventricular cardiomyocytes infected with adenoviruses expressing control shRNA, FHF2 shRNA  
1069 alone or with WT (FHF2-VY-WT), phosphosilent (mutation to alanine) or phosphomimetic (mutation to  
1070 glutamate) FHF2-VY at indicated sites. Currents were recorded as described in the legend to **Figure 3**.

## Regulation of Na<sub>v</sub>1.5 by FHF2 phosphorylation

1071 The  $I_{Na}$ ,  $\tau_{fast}$ ,  $\tau_{slow}$  and  $A_{fast}/A_{slow}$  values presented were determined from analyses of records obtained on  
1072 depolarizations to -10 mV (HP=-120 mV). \* $p$ <0.05, \*\* $p$ <0.01, \*\*\* $p$ <0.001, \*\*\*\* $p$ <0.0001 *versus* control  
1073 shRNA; # $p$ <0.05, ## $p$ <0.01, ### $p$ <0.001, #### $p$ <0.0001 *versus* FHF2 shRNA; one-way ANOVA. Current  
1074 densities, time- and voltage-dependent properties, as well as statistical comparisons across groups are  
1075 provided in **Table 2**.

1076

1077 **Figure 5.** The increased closed-state and open-state inactivation rates of Na<sub>v</sub> channels induced by FHF2  
1078 knockdown is completely rescued by the FHF2-VY isoform in adult mouse ventricular cardiomyocytes.  
1079 (A) Representative whole-cell voltage-gated Na<sup>+</sup> currents recorded 48 hours following isolation of FHF2-  
1080 lox or cardiac specific FHF2-knockdown (FHF2-KD) adult mouse ventricular cardiomyocytes and/or  
1081 infection with WT FHF2-VY (FHF2-VY-WT)-expressing adenoviruses using the protocols illustrated in  
1082 each panel. Scale bars are 1 nA and 3 ms. Voltage-dependences of steady-state current inactivation (B)  
1083 and activation (C). (D) Mean ± SEM peak Na<sup>+</sup> current ( $I_{Na}$ ) densities plotted as a function of test  
1084 potential. (E) Superimposed representative current traces recorded at 0 mV (HP=-120 mV) from FHF2-  
1085 lox (black) or FHF2-KD adult mouse ventricular cardiomyocytes infected (red) or not (green) with FHF2-  
1086 VY-WT-expressing adenoviruses. Mean ± SEM time constants of fast ( $\tau_{fast}$ , F) and slow ( $\tau_{slow}$ , G)  
1087 inactivation, and proportions of fast to slow inactivation components ( $A_{fast}/A_{slow}$ , H) plotted as a function  
1088 of test potential. Current densities, time- and voltage-dependent properties, as well as statistical  
1089 comparisons across groups are provided in **Figure 6 & Table 3**.

1090

1091 **Figure 6.** Distributions and mean ± SEM membrane potentials for half-activation (A) and half-  
1092 inactivation (B), peak Na<sup>+</sup> current ( $I_{Na}$ ) densities (C), time constants of fast ( $\tau_{fast}$ , D) and slow ( $\tau_{slow}$ , E)  
1093 inactivation, and proportions of fast to slow inactivation components ( $A_{fast}/A_{slow}$ , F) from FHF2-lox or  
1094 cardiac specific FHF2-knockdown (FHF2-KD) adult mouse ventricular cardiomyocytes infected or not  
1095 with WT (FHF2-VY-WT), phosphosilent (mutation to alanine) or phosphomimetic (mutation to

## Regulation of Na<sub>v</sub>1.5 by FHF2 phosphorylation

1096 glutamate) FHF2-VY-expressing adenoviruses at indicated sites. Currents were recorded as described in  
1097 the legend to **Figure 5**. The  $I_{Na}$ ,  $\tau_{fast}$ ,  $\tau_{slow}$  and  $A_{fast}/A_{slow}$  values presented were determined from analyses  
1098 of records obtained on depolarizations to -20 mV (HP=-120 mV). \*\* $p$ <0.01, \*\*\*\* $p$ <0.0001 *versus* FHF2-  
1099 lox; ### $p$ <0.001, #### $p$ <0.0001 *versus* FHF2-KD; one-way ANOVA. Current densities, time- and voltage-  
1100 dependent properties, as well as statistical comparisons across groups are provided in **Table 3**.

**A**

|               |     |                                                             |         |                                                   |           |           |                                        |     |
|---------------|-----|-------------------------------------------------------------|---------|---------------------------------------------------|-----------|-----------|----------------------------------------|-----|
| Mouse FHF2-VY | 1   | MSGK---V-----TKPKEEKDASKVLDAPPPTQEIYMLRQ                    | S35 S38 | DELKKEKESPFRAKCH---EIFCCPLKQVH-HKENTEPE           | 72        |           |                                        |     |
| Mouse FHF2-V  | 1   | MSGK---V-----TKP-----                                       |         | -----KEEKDASK                                     | 16        |           |                                        |     |
| Mouse FHF2-Y  | 1   | -----MLRQ                                                   | S35 S38 | DELKKEKESPFRAKCH---EIFCCPLKQVH-HKENTEPE           | 43        |           |                                        |     |
| Mouse FHF2-A  | 1   | MAAAIASSLIRQKRQAREREKSNACKCVSSPSK-----                      |         | -----GKTSCKDNKLNLFVSRVKLFQS-KKRRRRRP              | 62        |           |                                        |     |
| Mouse FHF2-B  | 1   | -----                                                       |         | -----M-ALLRKSYS                                   | 9         |           |                                        |     |
| Human FHF1-A  | 1   | MAAAIASSLIRQKRQ-ARESNS-----DR-----                          |         | -----VSGSKRRSSPSKDGSRSLCERHVLGVFSKVFCSGRKRPVRRRP  | 66        |           |                                        |     |
| Human FHF1-B  | 1   | -----                                                       |         | -----MESK                                         | 4         |           |                                        |     |
| Mouse FHF4-B  | 1   | MVKP--VPLFRRTDFKLLCNHKGFLFLR-----                           |         | -----VSKLLGCFSP-KSMWFLWNIFSKGTHMLQCLGCKSLKKNKNT   | 69        |           |                                        |     |
| Mouse FHF2-VY | 73  | EPQLKGIVTKLYSRQGYHLQLQADGTIDGTKDEDSTYTLFNLI                 |         | PVGLRVVAIQGVQTKLYLAMNSEGYLYTSEHFTPECKFKESVFE      | 159       |           |                                        |     |
| Mouse FHF2-V  | 17  | EPQLKGIVTKLYSRQGYHLQLQADGTIDGTKDEDSTYTLFNLI                 |         | PVGLRVVAIQGVQTKLYLAMNSEGYLYTSELFTPECKFKESVFE      | 103       |           |                                        |     |
| Mouse FHF2-Y  | 44  | EPQLKGIVTKLYSRQGYHLQLQADGTIDGTKDEDSTYTLFNLI                 |         | PVGLRVVAIQGVQTKLYLAMNSEGYLYTSELFTPECKFKESVFE      | 130       |           |                                        |     |
| Mouse FHF2-A  | 63  | EPQLKGIVTKLYSRQGYHLQLQADGTIDGTKDEDSTYTLFNLI                 |         | PVGLRVVAIQGVQTKLYLAMNSEGYLYTSEHFTPECKFKESVFE      | 149       |           |                                        |     |
| Mouse FHF2-B  | 10  | EPQLKGIVTKLYSRQGYHLQLQADGTIDGTKDEDSTYTLFNLI                 |         | PVGLRVVAIQGVQTKLYLAMNSEGYLYTSELFTPECKFKESVFE      | 96        |           |                                        |     |
| Human FHF1-A  | 67  | EPQLKGIVTRLFSSQGYFLQMHDPDGTIDGTKDENSIDYTLFNLI               |         | PVGLRVVAIQGVKASLYVAMNNEGELYSSDVFTPECKFKESVFE      | 153       |           |                                        |     |
| Human FHF1-B  | 5   | EPQLKGIVTRLFSSQGYFLQMHDPDGTIDGTKDENSIDYTLFNLI               |         | PVGLRVVAIQGVKASLYVAMNNEGELYSSDVFTPECKFKESVFE      | 91        |           |                                        |     |
| Mouse FHF4-B  | 70  | DPQLKGIVTRLYCRQGYFLQMHDPDGDALDGTKDDSTNSTL                   |         | FNLI PVGLRVVAIQGVKGLYIAMNNEGELYLPSELFTPECKFKESVFE | 156       |           |                                        |     |
| Mouse FHF2-VY | 160 | NYVVTYSSMIYRQQQSGRGWYLGlnKEGEIMKGNHVKKNKPAAHFLPKPLKVAMYKEP  | S218    | S230 T232                                         | S238 S240 | S250 T255 | LHDLTFPSRSGGPTHSRVSGLNGGKSMHNES        | 255 |
| Mouse FHF2-V  | 104 | NYVVTYSSMIYRQQQSGRGWYLGlnKEGEIMKGNHVKKNKPAAHFLPKPLKVAMYKEP  |         |                                                   |           |           | LHDLTFPSRSGGPTHSRVSGLNGGKSMHNES        | 199 |
| Mouse FHF2-Y  | 131 | NYVVTYSSMIYRQQQSGRGWYLGlnKEGEIMKGNHVKKNKPAAHFLPKPLKVAMYKEP  |         |                                                   |           |           | LHDLTFPSRSGGPTHSRVSGLNGGKSMHNES        | 226 |
| Mouse FHF2-A  | 150 | NYVVTYSSMIYRQQQSGRGWYLGlnKEGEIMKGNHVKKNKPAAHFLPKPLKVAMYKEP  |         |                                                   |           |           | LHDLTFPSRSGGPTHSRVSGLNGGKSMHNES        | 245 |
| Mouse FHF2-B  | 97  | NYVVTYSSMIYRQQQSGRGWYLGlnKEGEIMKGNHVKKNKPAAHFLPKPLKVAMYKEP  |         |                                                   |           |           | LHDLTFPSRSGGPTHSRVSGLNGGKSMHNES        | 192 |
| Human FHF1-A  | 154 | NYVVIYSTLYRQQQESGRWFLGLNKEGQIMKGNRVKKTTPSSHVFVPKPIEVCMYREP  |         |                                                   |           |           | LHEIGEKQGRS-----RKSSGPTMNGGKVVNQDST    | 243 |
| Human FHF1-B  | 92  | NYVVIYSTLYRQQQESGRWFLGLNKEGQIMKGNRVKKTTPSSHVFVPKPIEVCMYREP  |         |                                                   |           |           | LHEIGEKQGRS-----RKSSGPTMNGGKVVNQDST    | 181 |
| Mouse FHF4-B  | 157 | NYVVIYSSMLYRQQESGRWFLGLNKEGQVIMKGNRVKKTTPSSHVFVPKPIEVCMYREP |         |                                                   |           |           | LHDVGETVPKAGVTFPSKTSASAIMNGGKVPVKNCKTT | 252 |

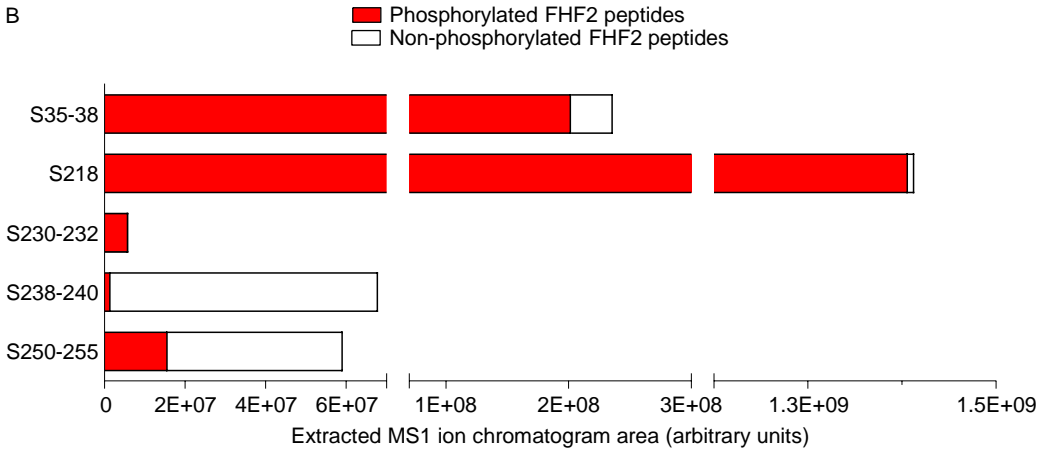

Figure 1.

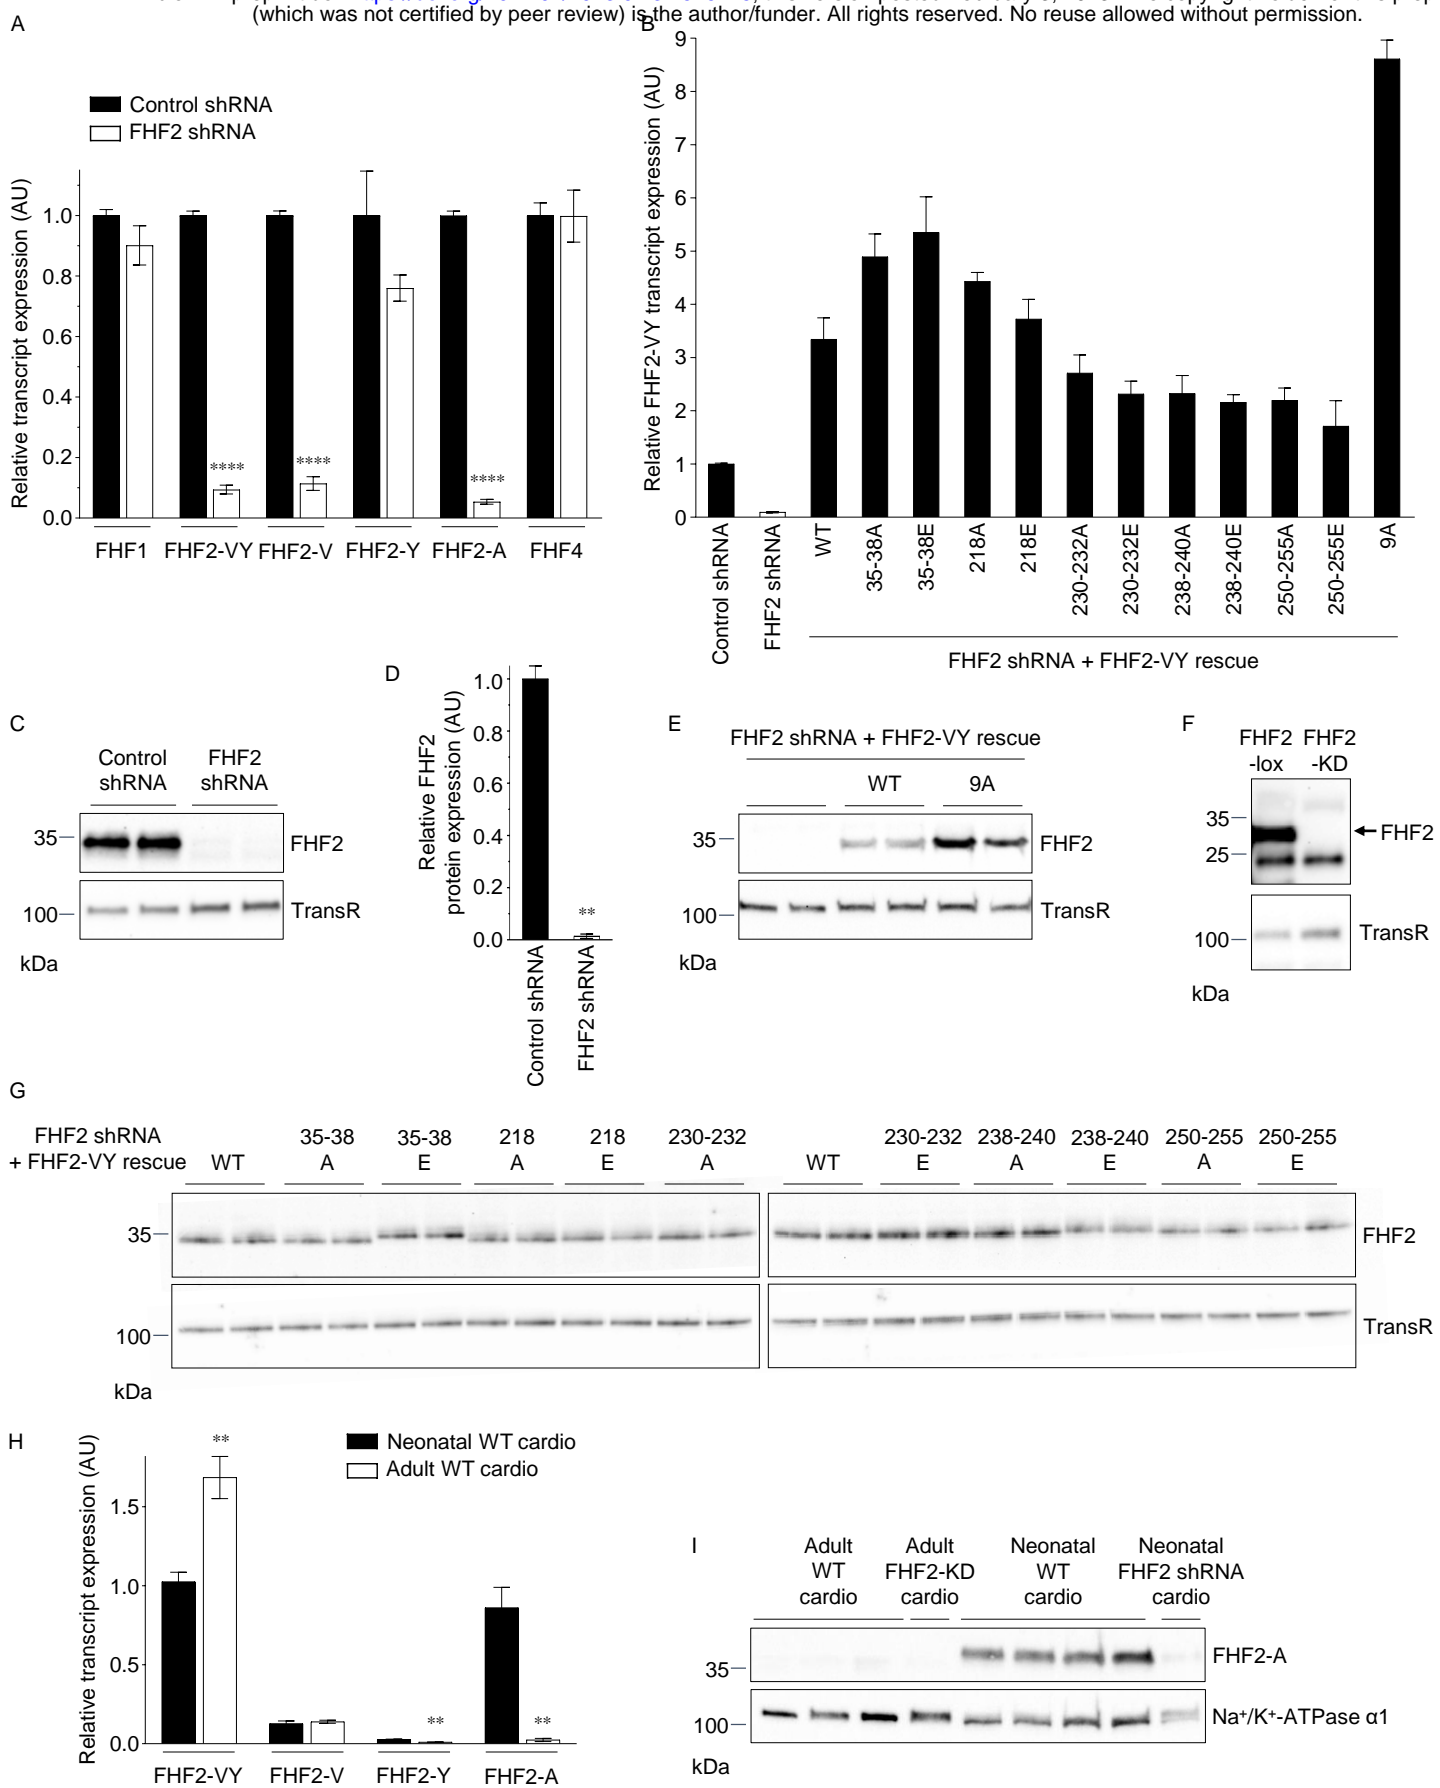

Figure 2.

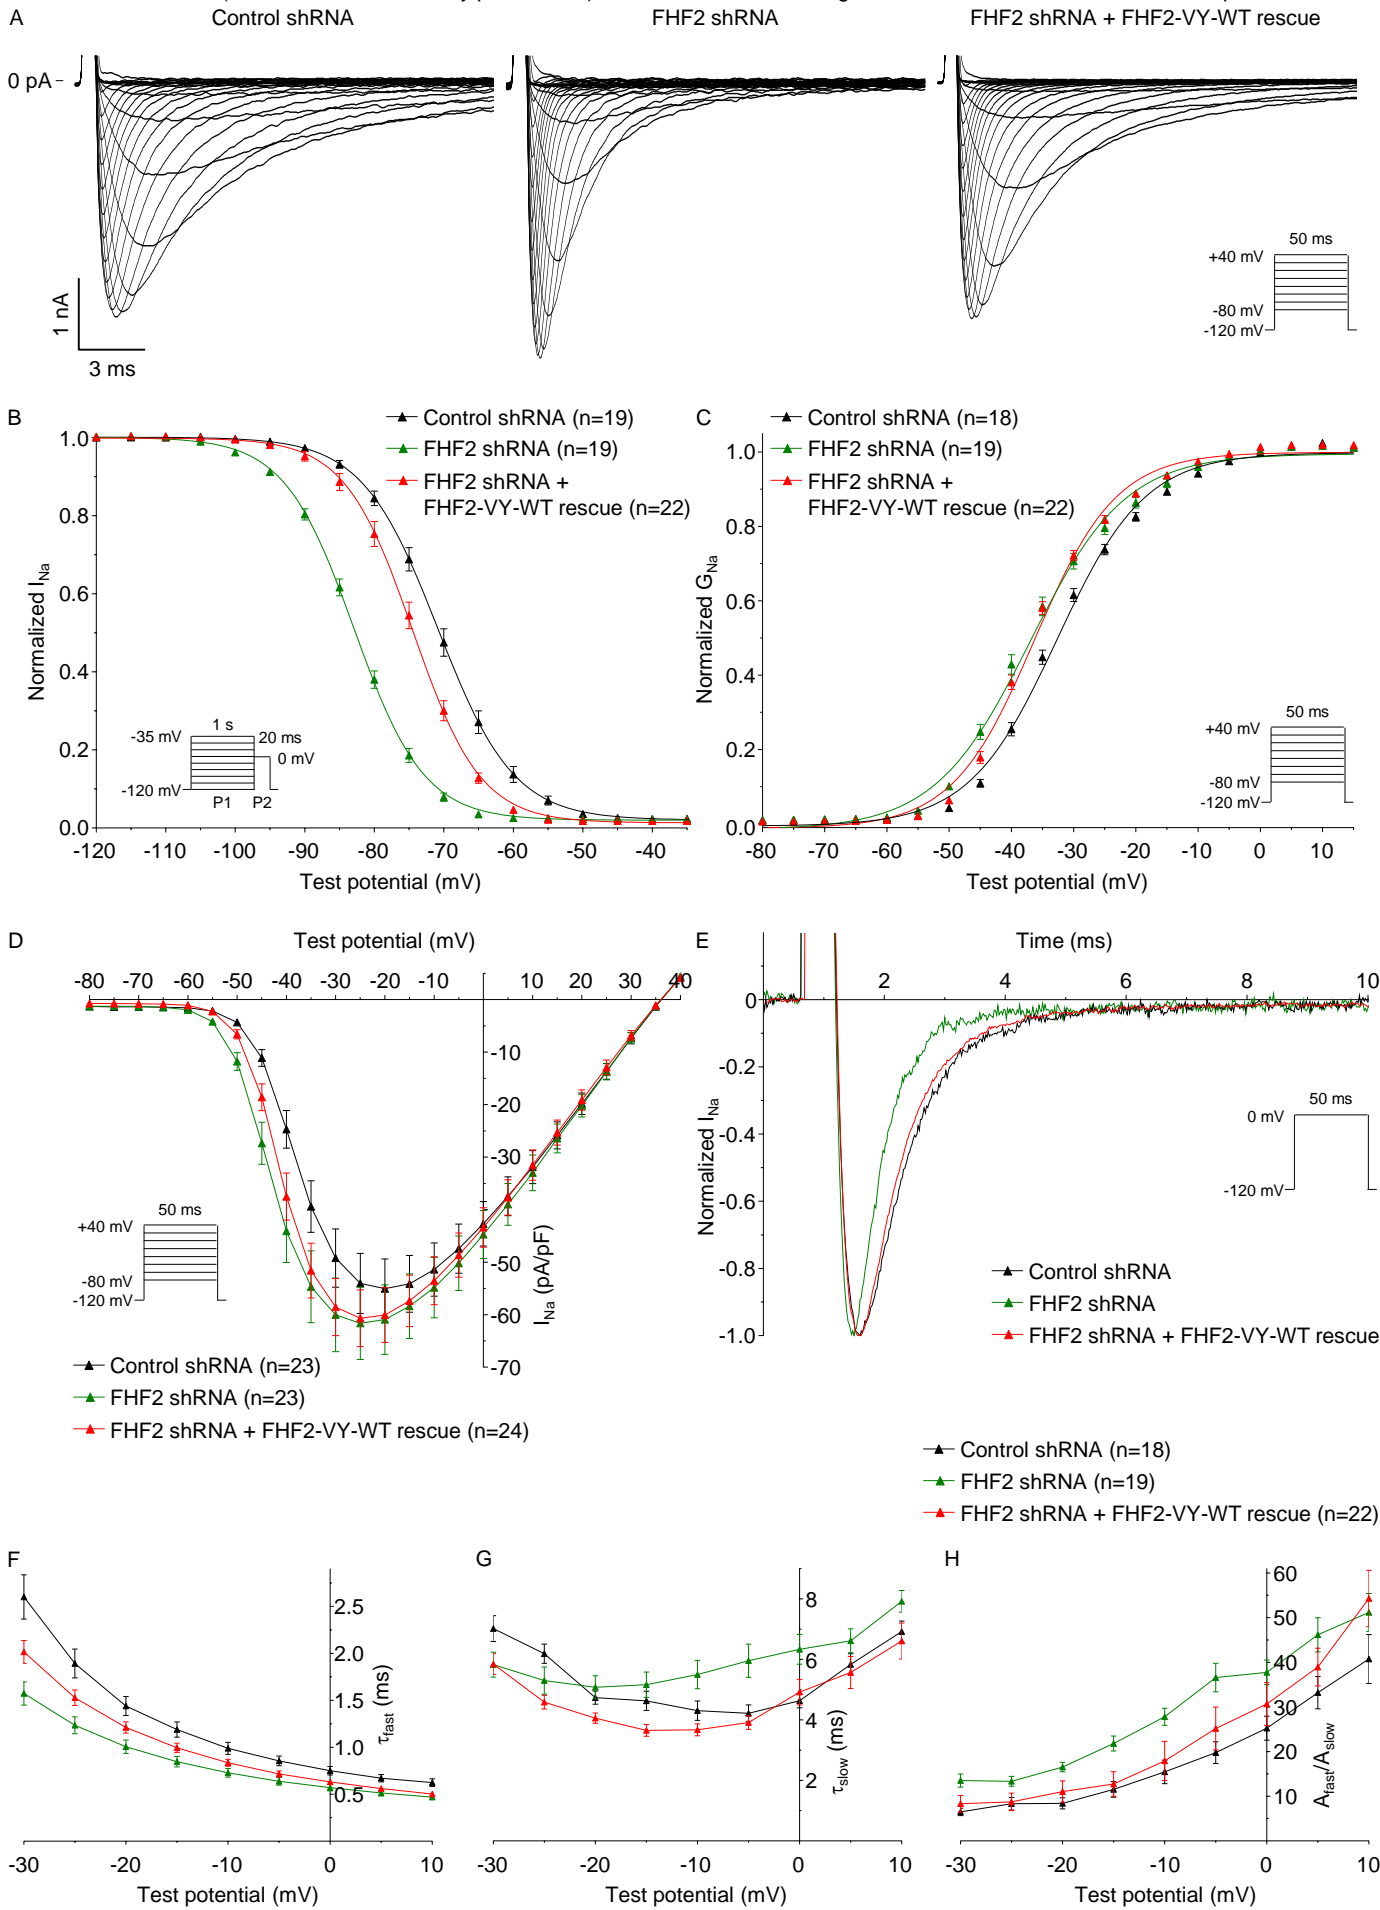

Figure 3.

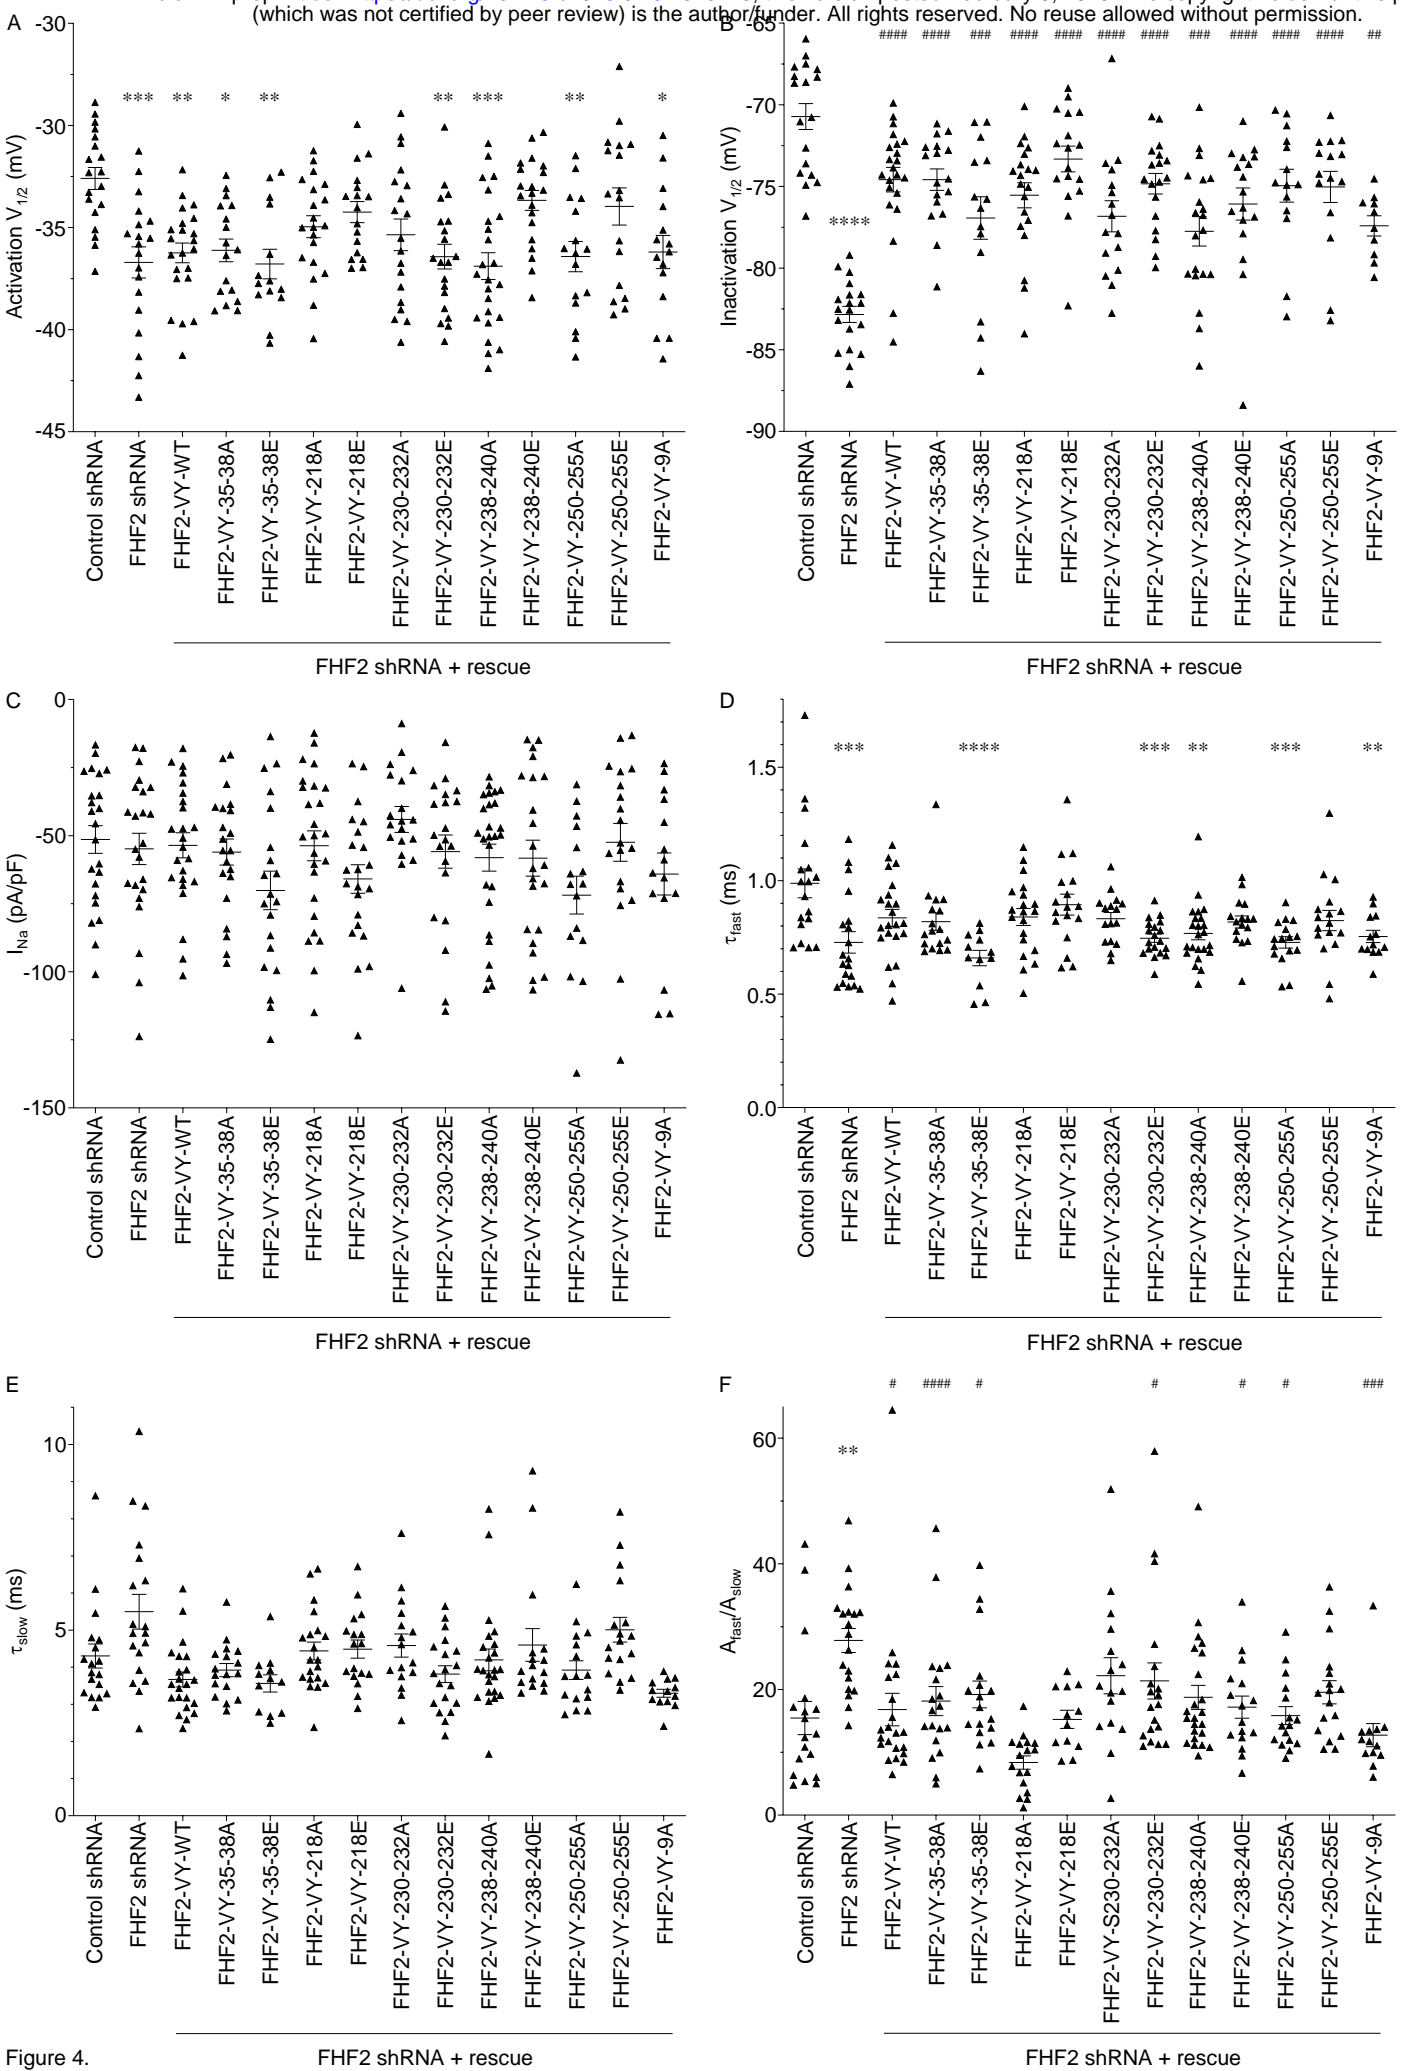

Figure 4.

FHF2 shRNA + rescue

FHF2 shRNA + rescue



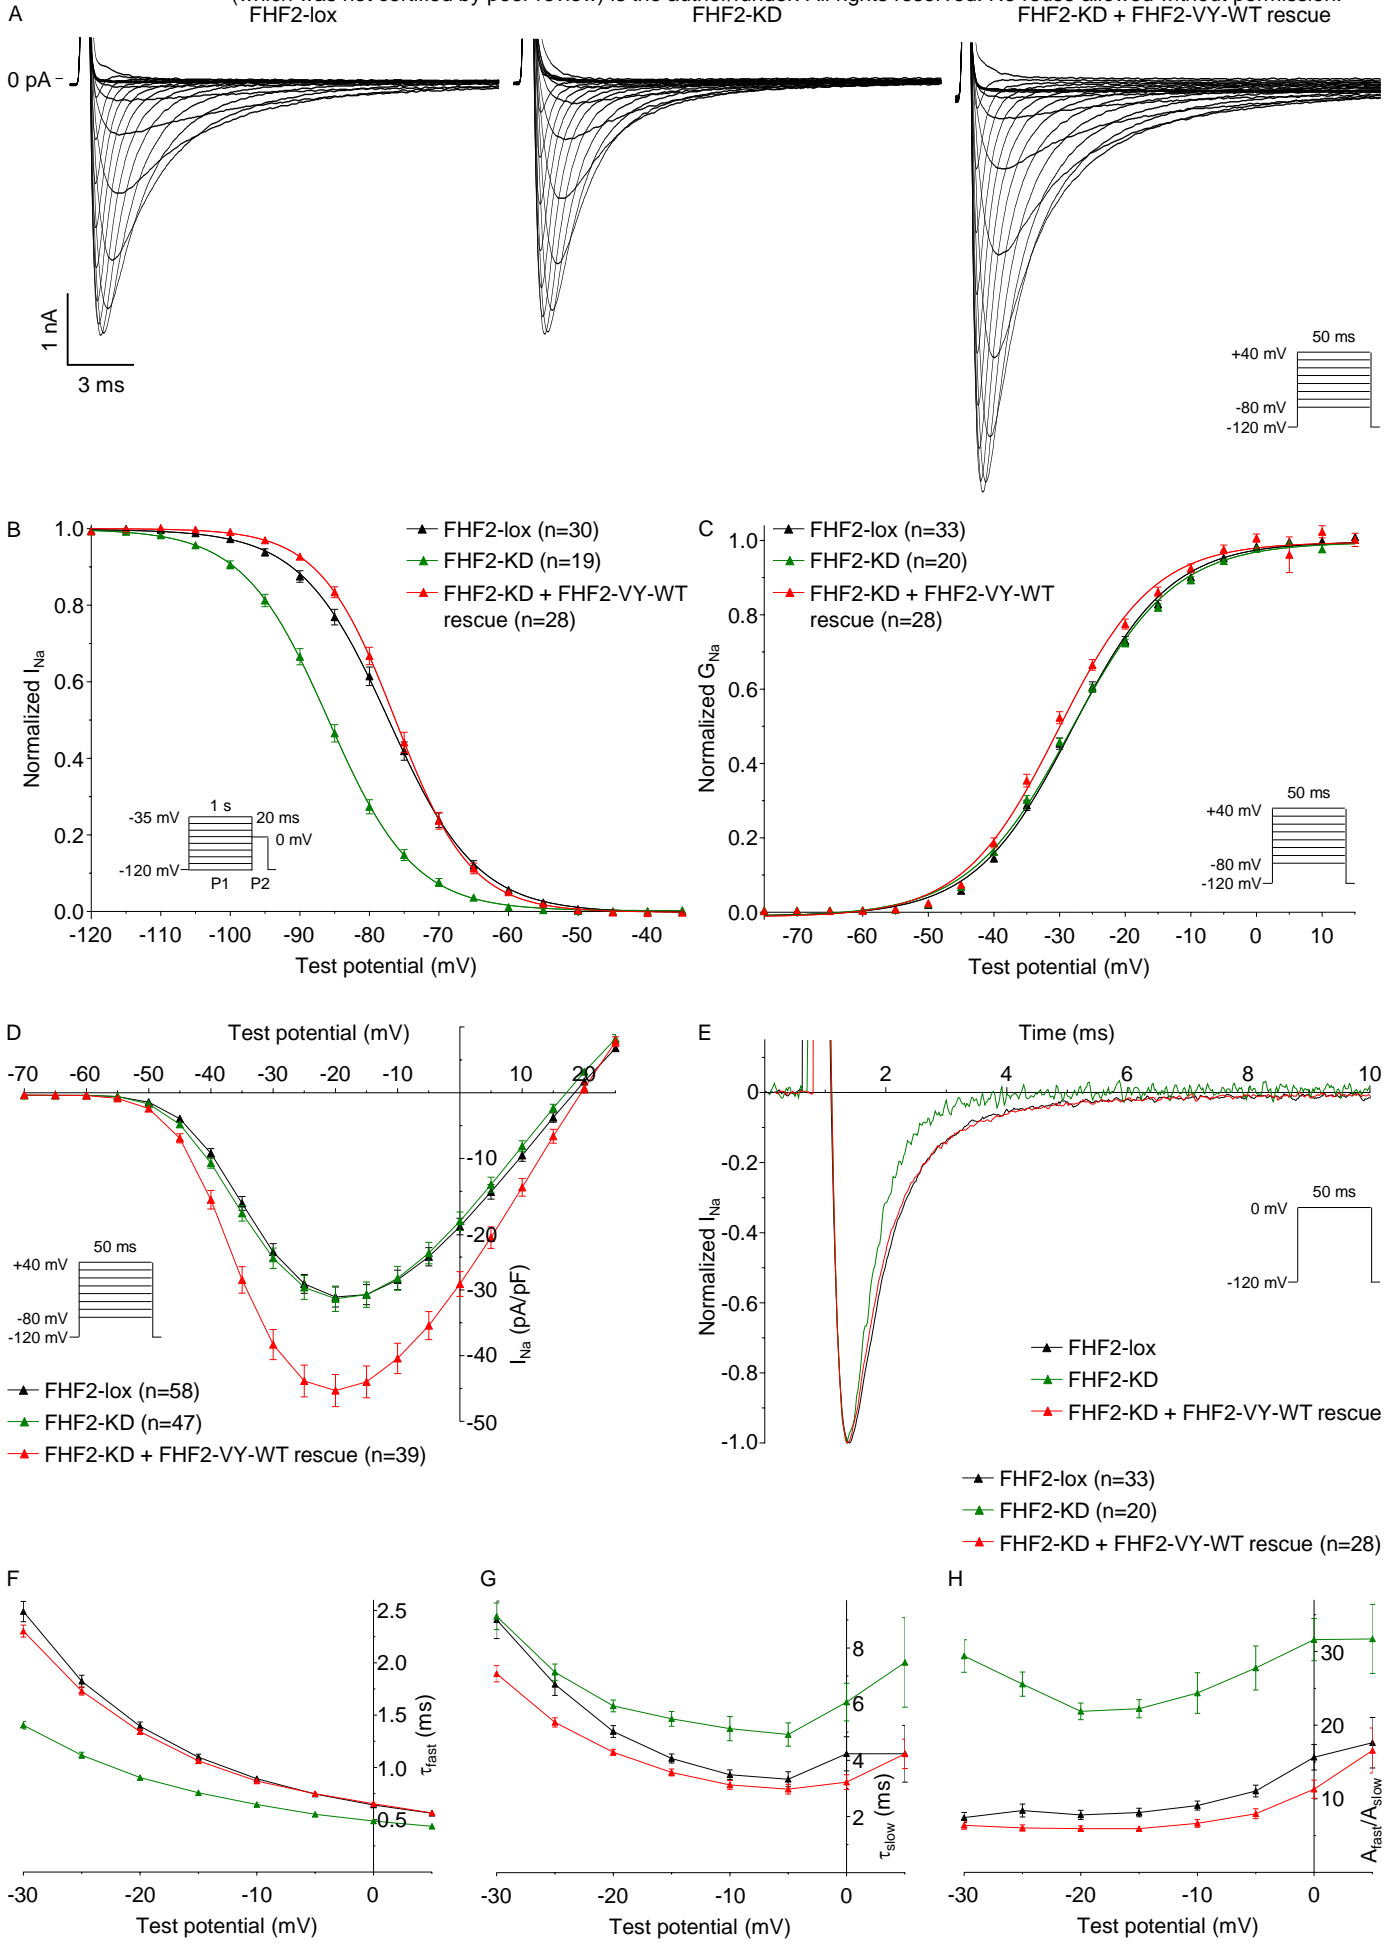

Figure 5.

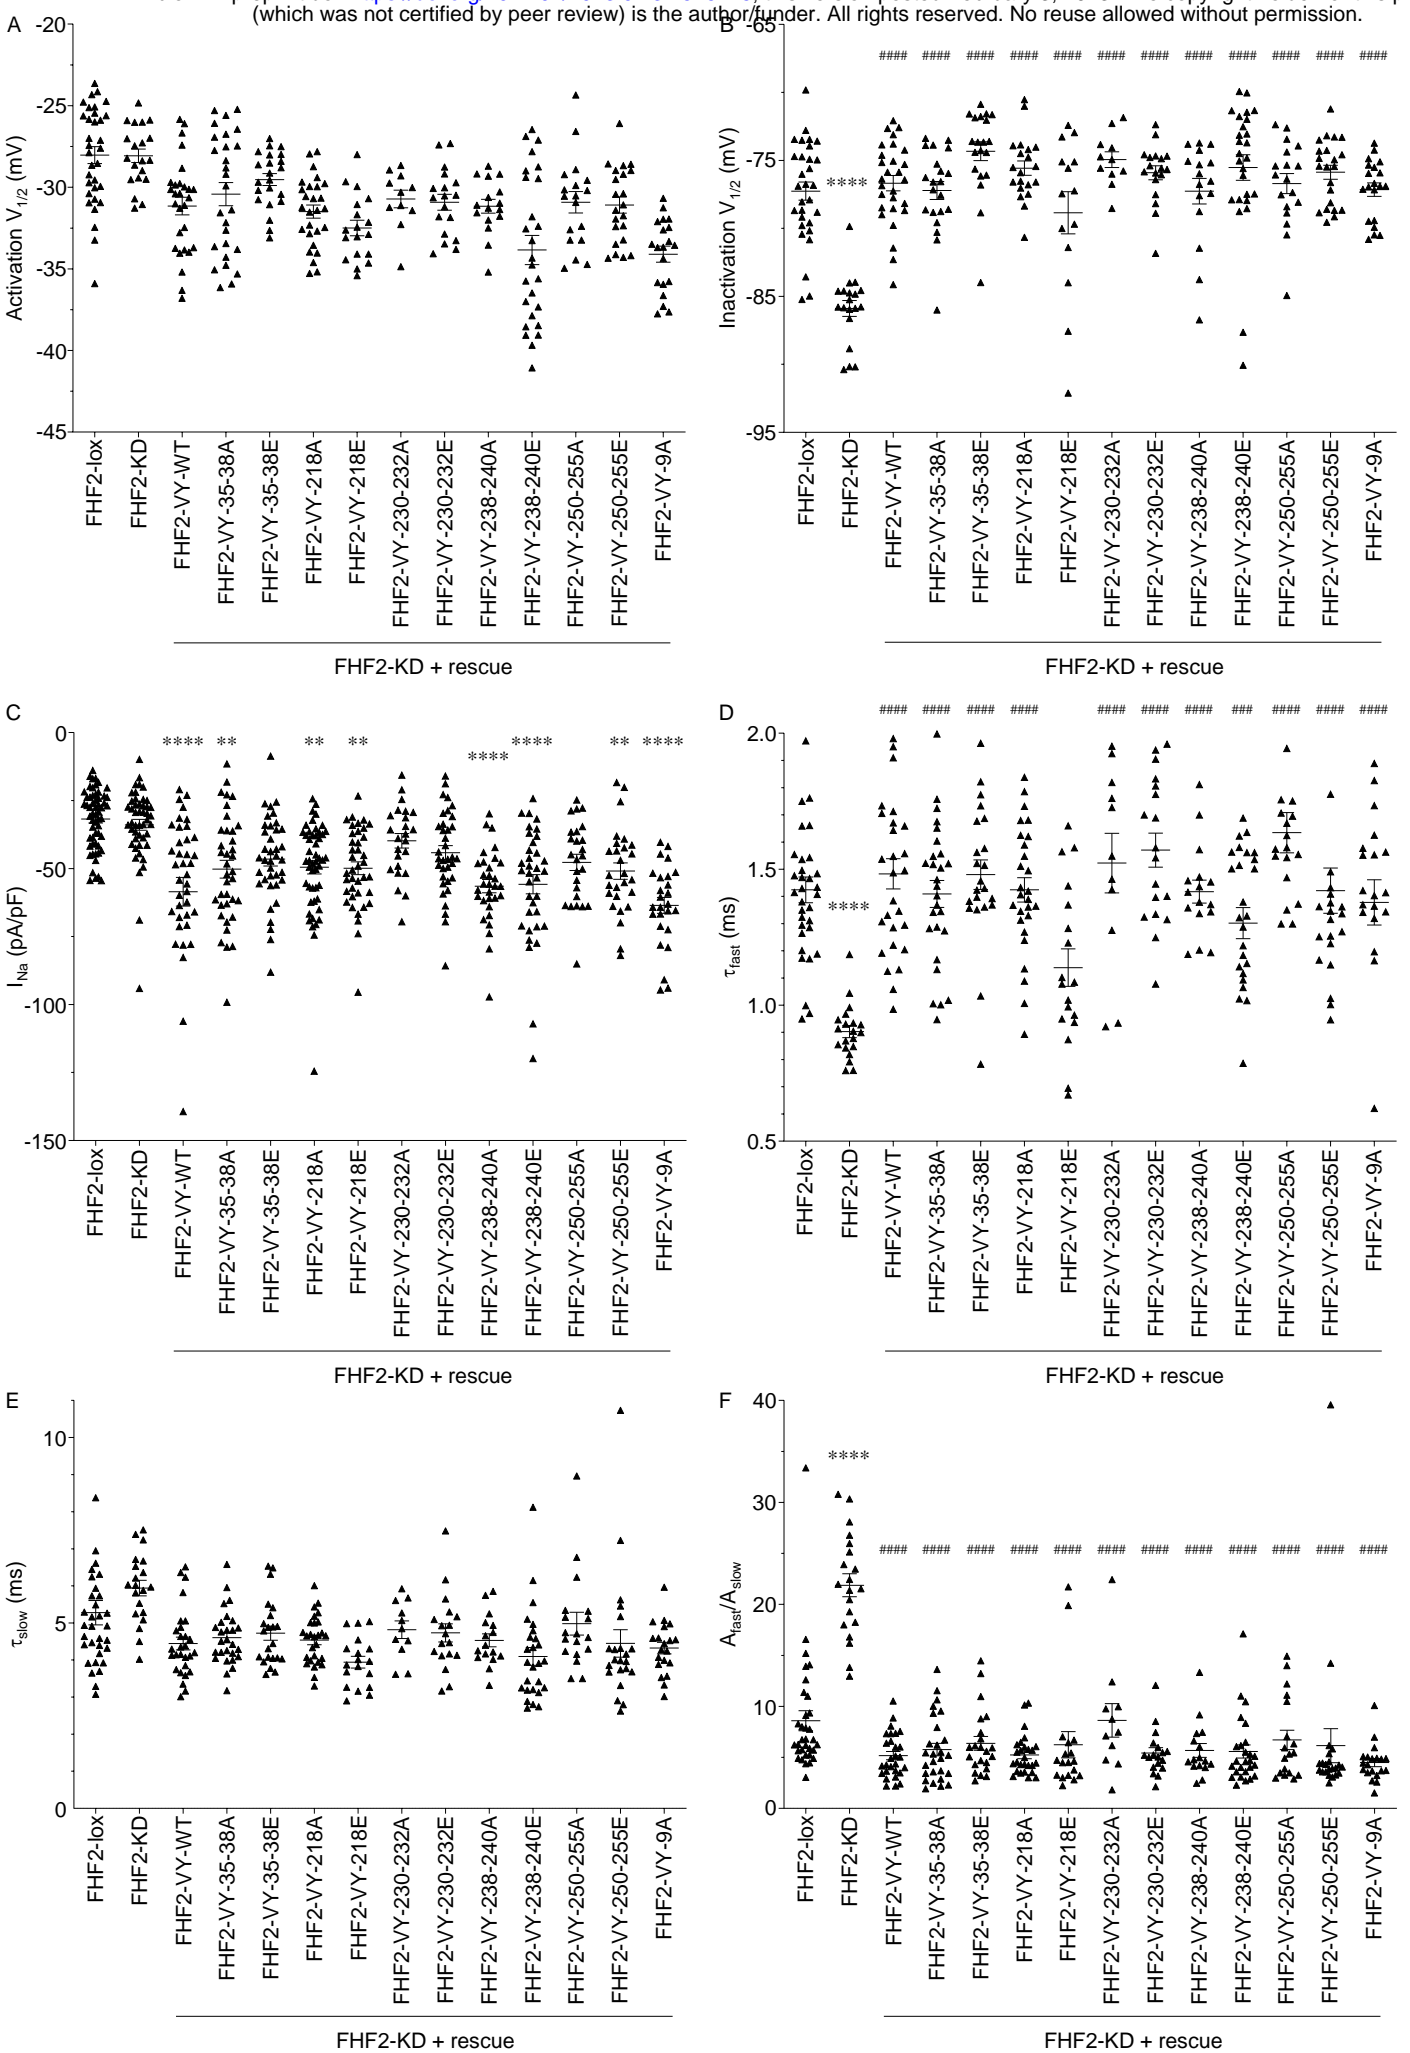

Figure 6.

**Table 1.** Phosphorylation sites, phosphopeptides and site-discriminating ions identified in FHF2 proteins from Na<sub>v</sub> channel complexes purified from adult mouse left ventricles using MS

| Phosphorylation site(s) | Phosphopeptide sequence | <i>m/z</i> (charge) | AScore     | b ion   | Phospho b ion | y ion   | Phospho y ion |
|-------------------------|-------------------------|---------------------|------------|---------|---------------|---------|---------------|
| S35                     | 33-QD(pS)QSAELK         | 828.936 (+2)        | 10         | b2 (+1) | b5            | y7 (+1) | y8 (+1)       |
| S38                     | 33-QDSIQ(pS)AELK        | 828.933 (+2)        | 38         | b5 (+1) | (-)           | y4 (+1) | (-)           |
| S35 + S38               | 33-QD(pS)IQ(pS)AELK     | 868.917 (+2)        | 1000; 1000 | b2 (+1) | b5            | y4 (+1) | y5; y8        |
| S218                    | 216-EP(pS)LLHDLTEFSR    | 870.414 (+2)        | 54         | b1 (+1) | b7            | y9 (+1) | (-)           |
| S230 + T232             | 228-SG(pS)G(pT)PTKSR    | 532.593 (+3)        | 11; 14     | b2      | (-)           | y5 (+2) | (-)           |
| T232                    | 228-SGSG(pT)PTKSR       | 505.936 (+3)        | 8          | b4      | (-)           | y5 (+2) | (-)           |
| S238                    | 236-SR(pS)VSGVLNGGK     | 566.982 (+3)        | 9          | b2      | b3 (+2)       | y9      | (-)           |
| S240                    | 238-SV(pS)GVLNGGK       | 728.401 (+2)        | 1000       | b2      | (-)           | y7      | (-)           |
| S250                    | 248-SM(pS)HNEST         | 609.238 (+2)        | 2          | b2      | b5 (+2)       | (-)     | (-)           |
| T255                    | 248-SMSHNES(pT)         | 601.240 (+2)        | 12         | b7 (+2) | (-)           | (-)     | (-)           |
| S250 + S255             | 248-SM(pS)HNES(pT)      | 641.226 (+2)        | 0; 0       | b2      | (-)           | (-)     | (-)           |

The site-discriminating ions observed in MS/MS spectra of each annotated FHF2 phosphopeptide support the assignment of the indicated phosphorylation site(s). The PEAKS AScore is a quality indicator of site localization. The manually verified charge state of unphosphorylated and phosphorylated site-discriminating b and y ions is reported in parentheses. The (-) symbol indicates that the ion was not detected.

**Table 2.** Voltage-gated Na<sup>+</sup> current densities and properties in neonatal mouse ventricular cardiomyocytes infected with control shRNA, FHF2 shRNA alone or with WT or phosphomutant FHF2-VY-expressing adenoviruses

|                                  | I <sub>Na</sub> (pA/pF) | Time to peak (ms)   | Time course of inactivation |                        |                                      | Voltage-dependence of activation |                   | Voltage-dependence of inactivation |                   | Recovery from inactivation |                        |
|----------------------------------|-------------------------|---------------------|-----------------------------|------------------------|--------------------------------------|----------------------------------|-------------------|------------------------------------|-------------------|----------------------------|------------------------|
|                                  |                         |                     | t <sub>fast</sub> (ms)      | t <sub>slow</sub> (ms) | A <sub>fast</sub> /A <sub>slow</sub> | V <sub>1/2</sub> (mV)            | k (mV)            | V <sub>1/2</sub> (mV)              | k (mV)            | t <sub>fast</sub> (ms)     | t <sub>slow</sub> (ms) |
| Control shRNA                    | -51.4 ± 5.1<br>(23)     | 1.03 ± 0.05<br>(19) | 0.99 ± 0.06<br>(18)         | 4.3 ± 0.3<br>(18)      | 15.5 ± 2.6<br>(18)                   | -32.6 ± 0.5<br>(19)              | 7.0 ± 0.2<br>(19) | -70.7 ± 0.8<br>(18)                | 5.1 ± 0.2<br>(18) | 3.1 ± 0.3<br>(16)          | 51.1 ± 8.7<br>(16)     |
| FHF2 shRNA                       | -54.9 ± 5.7<br>(23)     | 0.92 ± 0.04<br>(19) | 0.73 ± 0.05<br>(19) ***     | 5.5 ± 0.5<br>(19)      | 27.8 ± 1.9<br>(19) **                | -36.7 ± 0.8<br>(19) ***          | 7.5 ± 0.3<br>(19) | -82.8 ± 0.5<br>(19) ****           | 4.9 ± 0.1<br>(19) | 4.0 ± 0.3<br>(19)          | 45.4 ± 7.5<br>(19)     |
| FHF2 shRNA +<br>FHF2-VY-WT       | -53.5 ± 4.6<br>(24)     | 0.97 ± 0.03<br>(23) | 0.84 ± 0.04<br>(22)         | 3.7 ± 0.2<br>(22)      | 16.8 ± 2.6<br>(22) #                 | -36.2 ± 0.5<br>(22) **           | 6.5 ± 0.2<br>(22) | -74.6 ± 0.8<br>(22) #####          | 4.5 ± 0.1<br>(22) | 2.7 ± 0.1<br>(19)          | 56.8 ± 8.5<br>(19)     |
| FHF2 shRNA +<br>FHF2-VY-35-38A   | -56.0 ± 4.8<br>(21)     | 0.90 ± 0.02<br>(17) | 0.82 ± 0.04<br>(17)         | 3.9 ± 0.2<br>(17)      | 8.4 ± 1.1<br>(17) #####              | -36.1 ± 0.6<br>(17) *            | 6.8 ± 0.2<br>(17) | -74.6 ± 0.7<br>(17) #####          | 4.9 ± 0.2<br>(17) | 2.9 ± 0.2<br>(16)          | 44.8 ± 10.0<br>(16)    |
| FHF2 shRNA +<br>FHF2-VY-35-38E   | -70.1 ± 7.1<br>(20)     | 0.75 ± 0.02<br>(14) | 0.66 ± 0.03<br>(12) ****    | 3.6 ± 0.2<br>(12)      | 15.2 ± 1.4<br>(12) #                 | -36.8 ± 0.7<br>(14) **           | 7.1 ± 0.2<br>(14) | -76.9 ± 1.3<br>(14) ###            | 4.8 ± 0.2<br>(14) | 2.8 ± 0.2<br>(14)          | 61.1 ± 7.1<br>(14)     |
| FHF2 shRNA +<br>FHF2-VY-218A     | -53.7 ± 5.5<br>(25)     | 0.91 ± 0.03<br>(20) | 0.86 ± 0.03<br>(19)         | 4.3 ± 0.2<br>(19)      | 18.2 ± 2.3<br>(19)                   | -35.0 ± 0.5<br>(20)              | 7.1 ± 0.1<br>(20) | -75.5 ± 0.8<br>(20) #####          | 4.5 ± 0.1<br>(20) | 3.4 ± 0.2<br>(14)          | 46.6 ± 3.9<br>(14)     |
| FHF2 shRNA +<br>FHF2-VY-218E     | -65.9 ± 5.2<br>(22)     | 1.00 ± 0.04<br>(17) | 0.89 ± 0.05<br>(17)         | 4.5 ± 0.2<br>(17)      | 19.2 ± 2.1<br>(17)                   | -34.2 ± 0.5<br>(17)              | 6.6 ± 0.2<br>(17) | -73.3 ± 0.8<br>(17) #####          | 4.6 ± 0.1<br>(17) | 3.2 ± 0.2<br>(15)          | 52.7 ± 8.6<br>(15)     |
| FHF2 shRNA +<br>FHF2-VY-230-232A | -44.1 ± 4.8<br>(19)     | 0.78 ± 0.04<br>(19) | 0.83 ± 0.03<br>(16)         | 4.6 ± 0.3<br>(16)      | 22.2 ± 2.9<br>(16)                   | -35.4 ± 0.8<br>(19)              | 7.7 ± 0.2<br>(19) | -76.8 ± 1.0<br>(16) #####          | 4.8 ± 0.2<br>(16) | 3.1 ± 0.2<br>(14)          | 59.3 ± 10.5<br>(14)    |
| FHF2 shRNA +<br>FHF2-VY-230-232E | -55.9 ± 6.1<br>(20)     | 0.74 ± 0.03<br>(20) | 0.75 ± 0.02<br>(19) ***     | 3.8 ± 0.2<br>(19)      | 21.4 ± 2.9<br>(19) #                 | -36.4 ± 0.6<br>(20) **           | 6.7 ± 0.2<br>(20) | -74.8 ± 0.6<br>(18) #####          | 4.4 ± 0.1<br>(18) | 2.4 ± 0.2<br>(19)          | 55.1 ± 4.8<br>(19)     |
| FHF2 shRNA +<br>FHF2-VY-238-240A | -58.1 ± 4.9<br>(26)     | 0.73 ± 0.02<br>(24) | 0.77 ± 0.03<br>(23) **      | 4.2 ± 0.3<br>(23)      | 18.8 ± 1.9<br>(23)                   | -36.9 ± 0.7<br>(24) ***          | 7.2 ± 0.2<br>(24) | -77.8 ± 0.9<br>(20) ###            | 4.5 ± 0.1<br>(20) | 2.8 ± 0.1<br>(18)          | 64.6 ± 5.0<br>(18)     |
| FHF2 shRNA +<br>FHF2-VY-238-240E | -58.3 ± 6.6<br>(22)     | 0.77 ± 0.02<br>(20) | 0.82 ± 0.03<br>(16)         | 4.6 ± 0.4<br>(16)      | 17.2 ± 1.8<br>(16) #                 | -33.7 ± 0.5<br>(20)              | 7.3 ± 0.1<br>(20) | -76.1 ± 1.0<br>(17) #####          | 4.4 ± 0.1<br>(17) | 2.5 ± 0.2<br>(12)          | 64.1 ± 13.2<br>(12)    |
| FHF2 shRNA +<br>FHF2-VY-250-255A | -71.8 ± 7.0<br>(16)     | 0.75 ± 0.03<br>(16) | 0.73 ± 0.02<br>(16) ***     | 3.9 ± 0.3<br>(16)      | 15.8 ± 1.4<br>(16) #                 | -36.4 ± 0.7<br>(16) **           | 6.9 ± 0.2<br>(16) | -75.0 ± 1.0<br>(14) #####          | 4.9 ± 0.2<br>(14) | 2.4 ± 0.1<br>(14)          | 65.3 ± 7.1<br>(14)     |
| FHF2 shRNA +<br>FHF2-VY-250-255E | -52.4 ± 7.0<br>(19)     | 0.79 ± 0.02<br>(17) | 0.82 ± 0.04<br>(17)         | 5.0 ± 0.3<br>(17)      | 19.6 ± 1.8<br>(17)                   | -34.0 ± 0.9<br>(17)              | 7.4 ± 0.2<br>(17) | -75.0 ± 1.0<br>(15) #####          | 4.6 ± 0.2<br>(15) | 2.6 ± 0.1<br>(15)          | 49.4 ± 5.5<br>(15)     |
| FHF2 shRNA +<br>FHF2-VY-9A       | -64.1 ± 7.7<br>(15)     | 0.75 ± 0.02<br>(15) | 0.75 ± 0.03<br>(13) **      | 3.3 ± 0.1<br>(13)      | 12.7 ± 1.8<br>(13) ###               | -36.2 ± 0.8<br>(15) *            | 7.2 ± 0.3<br>(15) | -77.4 ± 0.6<br>(10) ##             | 4.2 ± 0.1<br>(10) | 4.4 ± 0.4<br>(8)           | 78.5 ± 7.6<br>(8)      |

Whole-cell voltage-gated Na<sup>+</sup> currents were recorded 48 hours following infection of neonatal WT mouse ventricular cardiomyocytes with adenoviruses expressing control shRNA, FHF2 shRNA alone or with wild-type (FHF2-VY-WT), phosphosilent (mutation to alanine) or phosphomimetic (mutation to glutamate) FHF2-VY cDNA constructs using the protocols described in the materials and methods section. The peak I<sub>Na</sub> density, time to peak I<sub>Na</sub>, and time course of inactivation properties presented were determined from analyses of records obtained on depolarizations to -10 mV (HP=-120 mV). All values are means ± SEM. The number of cells analyzed is provided in parentheses. \*p<0.05, \*\*p<0.01, \*\*\*p<0.001, \*\*\*\*p<0.0001 versus control shRNA; #p<0.05, ##p<0.01, ###p<0.001, ####p<0.0001 versus FHF2 shRNA; one-way ANOVA.

**Table 3.** Voltage-gated Na<sup>+</sup> current densities and properties in FHF2-lox and FHF2-KD adult mouse ventricular cardiomyocytes infected or not with WT or phosphomutant FHF2-VY-expressing adenoviruses

|                            | I <sub>Na</sub> (pA/pF) | Time to peak (ms) | Time course of inactivation |                       |                                      | Voltage-dependence of activation |                 | Voltage-dependence of inactivation |                | Recovery from inactivation |                       |
|----------------------------|-------------------------|-------------------|-----------------------------|-----------------------|--------------------------------------|----------------------------------|-----------------|------------------------------------|----------------|----------------------------|-----------------------|
|                            |                         |                   | t <sub>1/2</sub> (ms)       | t <sub>1/2</sub> (ms) | A <sub>fast</sub> /A <sub>slow</sub> | V <sub>1/2</sub> (mV)            | k (mV)          | V <sub>1/2</sub> (mV)              | k (mV)         | t <sub>1/2</sub> (ms)      | t <sub>1/2</sub> (ms) |
| FHF2-lox                   | -31.8 ± 1.4 (58)        | 1.09 ± 0.03 (33)  | 1.42 ± 0.05 (33)            | 5.3 ± 0.3 (33)        | 8.6 ± 1.0 (33)                       | -28.0 ± 0.5 (33)                 | 7.5 ± 0.1 (33)  | -77.3 ± 0.7 (30)                   | 6.3 ± 0.2 (30) | 2.9 ± 0.1 (27)             | 37.3 ± 1.2 (27)       |
| FHF2-KD                    | -33.9 ± 2.0 (47)        | 0.97 ± 0.03 (20)  | 0.90 ± 0.02 (20) ****       | 5.9 ± 0.2 (20)        | 21.9 ± 1.1 (20) ****                 | -28.1 ± 0.4 (20)                 | 7.8 ± 0.1 (20)  | -85.9 ± 0.6 (19) ****              | 6.1 ± 0.2 (19) | 3.0 ± 0.1 (18)             | 41.9 ± 2.6 (18)       |
| FHF2-KD + FHF2-VY-WT       | -58.5 ± 5.3 (39) ****   | 1.02 ± 0.03 (28)  | 1.48 ± 0.06 (28) #####      | 4.4 ± 0.2 (28)        | 5.2 ± 0.4 (28) #####                 | -31.2 ± 0.5 (28)                 | 7.1 ± 0.2 (28)  | -76.7 ± 0.6 (28) #####             | 5.2 ± 0.1 (28) | 3.2 ± 0.2 (27)             | 45.1 ± 2.5 (27)       |
| FHF2-KD + FHF2-VY-35-38A   | -50.2 ± 3.3 (37) **     | 1.01 ± 0.02 (27)  | 1.41 ± 0.05 (27) #####      | 4.6 ± 0.1 (27)        | 5.8 ± 0.6 (27) #####                 | -30.4 ± 0.7 (27)                 | 7.2 ± 0.2 (27)  | -77.2 ± 0.7 (21) #####             | 6.0 ± 0.2 (21) | 3.4 ± 0.2 (15)             | 40.2 ± 1.8 (15)       |
| FHF2-KD + FHF2-VY-35-38E   | -46.5 ± 2.5 (38)        | 1.09 ± 0.04 (22)  | 1.48 ± 0.05 (22) #####      | 4.7 ± 0.2 (22)        | 6.4 ± 0.7 (22) #####                 | -29.5 ± 0.4 (22)                 | 6.8 ± 0.1 (22)  | -74.3 ± 0.7 (20) #####             | 5.6 ± 0.2 (20) | 2.7 ± 0.1 (18)             | 39.9 ± 2.8 (18)       |
| FHF2-KD + FHF2-VY-218A     | -49.5 ± 2.4 (49) **     | 1.04 ± 0.02 (27)  | 1.42 ± 0.04 (27) #####      | 4.5 ± 0.1 (27)        | 5.2 ± 0.4 (27) #####                 | -31.5 ± 0.4 (27)                 | 7.1 ± 0.1 (27)  | -75.6 ± 0.5 (20) #####             | 5.7 ± 0.1 (20) | 3.0 ± 0.2 (20)             | 38.1 ± 2.1 (20)       |
| FHF2-KD + FHF2-VY-218E     | -49.9 ± 2.3 (39) **     | 0.93 ± 0.04 (18)  | 1.14 ± 0.07 (18)            | 3.9 ± 0.2 (18)        | 6.2 ± 1.3 (18) #####                 | -32.5 ± 0.5 (18)                 | 7.0 ± 0.16 (18) | -78.9 ± 1.6 (14) #####             | 6.6 ± 0.4 (14) | 3.0 ± 0.2 (11)             | 39.4 ± 2.5 (11)       |
| FHF2-KD + FHF2-VY-230-232A | -39.8 ± 2.7 (24)        | 1.25 ± 0.05 (11)  | 1.52 ± 0.11 (11) #####      | 4.8 ± 0.2 (11)        | 8.6 ± 1.6 (11) #####                 | -30.7 ± 0.5 (11)                 | 6.8 ± 0.2 (11)  | -74.9 ± 0.6 (11) #####             | 5.0 ± 0.1 (11) | 2.8 ± 0.1 (11)             | 38.2 ± 3.3 (11)       |
| FHF2-KD + FHF2-VY-230-232E | -44.2 ± 2.6 (35)        | 1.17 ± 0.03 (18)  | 1.57 ± 0.06 (18) #####      | 4.7 ± 0.2 (18)        | 5.4 ± 0.5 (18) #####                 | -30.9 ± 0.5 (18)                 | 7.0 ± 0.2 (18)  | -75.9 ± 0.5 (18) #####             | 5.1 ± 0.1 (18) | 3.1 ± 0.1 (18)             | 40.9 ± 2.3 (18)       |
| FHF2-KD + FHF2-VY-238-240A | -56.5 ± 2.4 (31) ****   | 1.01 ± 0.03 (16)  | 1.42 ± 0.04 (16) #####      | 4.5 ± 0.2 (16)        | 5.7 ± 0.7 (16) #####                 | -31.2 ± 0.4 (16)                 | 7.4 ± 0.2 (16)  | -77.3 ± 0.9 (16) #####             | 5.5 ± 0.2 (16) | 3.3 ± 0.3 (16)             | 39.6 ± 2.6 (16)       |
| FHF2-KD + FHF2-VY-238-240E | -55.8 ± 3.5 (35) ****   | 0.94 ± 0.03 (26)  | 1.30 ± 0.06 (26) ###        | 4.1 ± 0.2 (26)        | 5.6 ± 0.6 (26) #####                 | -33.8 ± 0.9 (26)                 | 7.2 ± 0.2 (26)  | -75.5 ± 0.9 (26) #####             | 5.4 ± 0.2 (26) | 2.6 ± 0.2 (26)             | 35.3 ± 1.8 (26)       |
| FHF2-KD + FHF2-VY-250-255A | -47.7 ± 3.0 (25)        | 1.08 ± 0.04 (18)  | 1.63 ± 0.07 (18) #####      | 5.0 ± 0.3 (18)        | 6.7 ± 0.9 (18) #####                 | -30.9 ± 0.7 (18)                 | 7.1 ± 0.2 (18)  | -76.7 ± 0.7 (18) #####             | 5.3 ± 0.2 (18) | 3.3 ± 0.3 (16)             | 51.1 ± 4.0 (16)       |
| FHF2-KD + FHF2-VY-250-255E | -50.9 ± 3.0 (27) **     | 1.01 ± 0.02 (22)  | 1.42 ± 0.08 (22) #####      | 4.4 ± 0.4 (22)        | 6.2 ± 1.7 (22) #####                 | -31.1 ± 0.5 (22)                 | 6.9 ± 0.2 (22)  | -75.9 ± 0.5 (22) #####             | 5.0 ± 0.1 (22) | 2.8 ± 0.1 (20)             | 38.7 ± 2.0 (20)       |
| FHF2-KD + FHF2-VY-9A       | -63.6 ± 2.9 (26) ****   | 0.98 ± 0.03 (20)  | 1.38 ± 0.08 (20) #####      | 4.3 ± 0.2 (20)        | 4.5 ± 0.4 (20) #####                 | -34.1 ± 0.5 (20)                 | 6.6 ± 0.2 (20)  | -77.2 ± 0.5 (20) #####             | 5.1 ± 0.1 (20) | 3.1 ± 0.2 (20)             | 37.2 ± 1.5 (20)       |

Whole-cell voltage-gated Na<sup>+</sup> currents were recorded 48 hours following isolation of FHF2-lox or FHF2-knockdown (FHF2-KD) adult mouse ventricular cardiomyocytes infected or not with wild-type (WT), phosphosilent (mutation to alanine) or phosphomimetic (mutation to glutamate) FHF2-VY-expressing adenoviruses using the protocols described in the materials and methods section. The peak Na<sup>+</sup> current (I<sub>Na</sub>) density, time to peak I<sub>Na</sub>, and time course of inactivation properties presented were determined from analyses of records obtained on depolarizations to -20 mV (HP = -120 mV). All values are means ± SEM. The number of cells analyzed is provided in parentheses. \*p<0.05, \*\*p<0.01, \*\*\*p<0.001, \*\*\*\*p<0.0001 versus FHF2-lox; #p<0.05, ##p<0.01, ###p<0.001, ####p<0.0001 versus FHF2-KD; one-way ANOVA.

**Table 4.** Late Na<sup>+</sup> current densities in FHF2-lox and FHF2-KD adult mouse ventricular cardiomyocytes infected or not with WT or phosphosilent FHF2-VY-expressing adenoviruses

|                          | FHF2-lox             | FHF2-KD               | FHF2-KD<br>+ FHF2-VY-WT  | FHF2-KD<br>+ FHF2-VY-9A  |
|--------------------------|----------------------|-----------------------|--------------------------|--------------------------|
| I <sub>NaL</sub> (pA/pF) | -0.41 ± 0.04<br>(25) | -0.53 ± 0.02<br>(60)* | -0.33 ± 0.02<br>(38)#### | -0.30 ± 0.02<br>(27)#### |

The TTX-sensitive late Na<sup>+</sup> current (I<sub>NaL</sub>) densities were measured at -20 mV (HP=-120 mV). All values are means ± SEM. The number of cells analyzed is provided in parentheses. \**p*<0.05 versus FHF2-lox; ####*p*<0.0001 versus FHF2-KD; one-way ANOVA.
